# Supplementary material for: Design of potent Mincle signalling agonists based on an alkyl β-glucoside template
Source: Royal Society of Chemistry journal article supplement (doi:10.1039/d0cc00670j), 2020-01-01

## Design of potent Mincle signalling agonists based on an alkyl $\beta$ -glucoside template

Dylan G.M. Smith, Yuki Hosono, Masahiro Nagata, Sho Yamasaki and Spencer J. Williams\*

### Contents

|                                                                                         |    |
|-----------------------------------------------------------------------------------------|----|
| Experimental .....                                                                      | 3  |
| General .....                                                                           | 3  |
| Ethyl 2-(cholesteryloxy)-ethanoate ( <b>12</b> ) .....                                  | 3  |
| 2-(Cholesteryloxy)-ethanoic acid ( <b>13</b> ) .....                                    | 3  |
| General procedure for the synthesis of 6- <i>O</i> -acyl- $\beta$ -D-glucosides: .....  | 3  |
| Octyl 6- <i>O</i> -octanoyl- $\beta$ -D-glucoside ( <b>3</b> ) .....                    | 4  |
| Octyl 6- <i>O</i> -palmitoyl- $\beta$ -D-glucoside ( <b>4</b> ) .....                   | 4  |
| Octyl 6- <i>O</i> -behenoyl- $\beta$ -D-glucoside ( <b>5</b> ) .....                    | 4  |
| Octyl 6- <i>O</i> -cholesteryloxyacetyl- $\beta$ -D-glucoside ( <b>14</b> ) .....       | 5  |
| Octyl 6- <i>O</i> -(2-hexadecyloctadecanoyl)- $\beta$ -D-glucoside ( <b>9</b> ) .....   | 5  |
| Lauryl 6- <i>O</i> -octanoyl- $\beta$ -D-glucoside ( <b>6</b> ) .....                   | 5  |
| Lauryl 6- <i>O</i> -palmitoyl- $\beta$ -D-glucoside ( <b>7</b> ) .....                  | 6  |
| Lauryl 6- <i>O</i> -behenoyl- $\beta$ -D-glucoside ( <b>8</b> ) .....                   | 6  |
| Lauryl 6- <i>O</i> -cholesteryloxyacetyl- $\beta$ -D-glucoside ( <b>15</b> ) .....      | 6  |
| Lauryl 6- <i>O</i> -(2-hexadecyloctadecanoyl)- $\beta$ -D-glucoside ( <b>10</b> ) ..... | 7  |
| NMR spectra .....                                                                       | 8  |
| Ethyl 2-(cholesteryloxy)-ethanoate ( <b>12</b> ) .....                                  | 8  |
| 2-(Cholesteryloxy)-ethanoic acid ( <b>13</b> ) .....                                    | 9  |
| Octyl 6- <i>O</i> -octanoyl- $\beta$ -D-glucoside ( <b>3</b> ) .....                    | 10 |
| Octyl 6- <i>O</i> -palmitoyl- $\beta$ -D-glucoside ( <b>4</b> ) .....                   | 11 |
| Octyl 6- <i>O</i> -behenoyl- $\beta$ -D-glucoside ( <b>5</b> ) .....                    | 12 |
| Octyl 6- <i>O</i> -cholesteryloxyacetyl- $\beta$ -D-glucoside ( <b>14</b> ) .....       | 13 |

|                                                                                         |    |
|-----------------------------------------------------------------------------------------|----|
| Octyl 6- <i>O</i> -(2-hexadecyloctadecanoyl)- $\beta$ -D-glucoside ( <b>9</b> ) .....   | 14 |
| Lauryl 6- <i>O</i> -octanoyl- $\beta$ -D-glucoside ( <b>6</b> ) .....                   | 15 |
| Lauryl 6- <i>O</i> -palmitoyl- $\beta$ -D-glucoside ( <b>7</b> ) .....                  | 16 |
| Lauryl 6- <i>O</i> -behenoyl- $\beta$ -D-glucoside ( <b>8</b> ) .....                   | 17 |
| Lauryl 6- <i>O</i> -cholesteryloxyacetyl- $\beta$ -D-glucoside ( <b>15</b> ).....       | 18 |
| Lauryl 6- <i>O</i> -(2-hexadecyloctadecanoyl)- $\beta$ -D-glucoside ( <b>10</b> ) ..... | 19 |

## Experimental

### General

Pyridine was distilled over KOH before use. Dichloromethane and THF were dried over alumina according to the method of Pangborn *et al.*<sup>1</sup> Reactions were monitored using TLC, performed with silica gel 60 F<sub>254</sub>. Detection was effected by charring in a mixture of 5% sulfuric acid in methanol, 10% phosphomolybdic acid in EtOH, and/or visualizing with UV light. Flash chromatography was performed according to the method of Still *et al.*<sup>2</sup> using silica gel 60.  $[\alpha]_D$  values are given in deg 10<sup>-1</sup> cm<sup>2</sup> g<sup>-1</sup>. NMR experiments were conducted on 400, 500 or 600 MHz instruments, with chemical shifts referenced relative to residual protiated solvent and are in ppm. <sup>1</sup>H-<sup>1</sup>H COSY spectra were used to confirm proton assignments and HMQC and HMBC spectra used for carbon assignments. Mass spectra were acquired in the ESI-QTOF mode.

### Ethyl 2-(cholesteryloxy)-ethanoate (12)

Boron trifluoride etherate (31  $\mu$ L, 0.25 mmol) was added to a cold solution of cholesterol (1.00 g, 2.59 mmol) and ethyl diazoacetate (2.42 mL, 2.85 mmol) in dry CH<sub>2</sub>Cl<sub>2</sub> (10 mL). The solution was stirred overnight at 20 °C and then poured into saturated aqueous NaHCO<sub>3</sub> (30 mL), and the product was extracted with CH<sub>2</sub>Cl<sub>2</sub> (225 mL). The organic phase was dried (Na<sub>2</sub>SO<sub>4</sub>) and concentrated under reduced pressure. The crude product was purified by flash chromatography (ethyl acetate/petroleum ether) afforded **12** as an amorphous solid (760 mg, 62%). <sup>1</sup>H NMR (400 MHz, CDCl<sub>3</sub>)  $\delta$  1.28 (3 H, t), 0.65–2.41 (43 H, m), 4.11 (2 H, s), 3.24 (1 H, m), 4.21 (2 H, q, *J* 7.2 Hz), 5.35 (1 H, m); <sup>13</sup>C NMR (100 MHz, CDCl<sub>3</sub>)  $\delta$  11.9, 14.2, 18.7, 19.3, 21.1, 22.6, 22.8, 23.8, 24.3, 28.0, 28.1, 28.2, 31.9, 31.9, 35.8, 36.2, 36.8, 37.1, 38.7, 39.5, 39.8, 42.3, 50.2, 56.1, 56.8, 60.8, 65.8, 80.0, 121.9, 140.5, 170.9.

### 2-(Cholesteryloxy)-ethanoic acid (13)

Aqueous sodium hydroxide (2 M, 320  $\mu$ l) was added to **12** (200 mg, 0.42 mmol) in ethanol (2.5 ml) and stirred at rt overnight. The solution was neutralized with Dowex 50WX8-200, then filtered and the filtrate concentrated under reduced pressure to give **13** as a glass that was used without further purification. <sup>1</sup>H NMR (400 MHz, CDCl<sub>3</sub>)  $\delta$  0.62–2.43 (44 H, m), 3.31 (1 H, m), 4.14 (2 H, s), 5.37 (1 H, m); <sup>13</sup>C NMR (100 MHz, CDCl<sub>3</sub>)  $\delta$  11.8, 18.7, 19.3, 21.1, 22.5, 22.8, 23.8, 24.3, 28.0, 28.1, 28.2, 31.8, 31.9, 35.8, 36.2, 36.7, 36.9, 38.7, 39.5, 39.7, 42.3, 50.1, 56.1, 56.7, 65.2, 80.5, 122.5, 139.8.

### General procedure for the synthesis of 6-O-acyl- $\beta$ -D-glucosides:

Carboxylic acid (1.2 equiv.) was added to a suspension of HBTU (1.2 equiv.) in pyridine (approx. 10 mL/mmol) and the mixture was stirred for 20-30 min before addition of the glycoside (1 equiv.). The

solution was stirred for 2-3 d and then concentrated. Flash chromatography of the residue (pet. spirits/EtOAc/MeOH) afforded the 6-*O*-acyl- $\beta$ -D-glucoside.

### Octyl 6-*O*-octanoyl- $\beta$ -D-glucoside (3)

Octyl  $\beta$ -D-glucoside (50 mg, 0.171 mmol) and octanoic acid (32  $\mu$ L, 0.205 mmol) according to the General procedure afforded **3** as a colourless glass (44 mg, 61%).  $[\alpha]_D^{25}$  -36.5 (c 2.2, CHCl<sub>3</sub>); <sup>1</sup>H NMR (400 MHz, CDCl<sub>3</sub>:CD<sub>3</sub>OD 95:5)  $\delta$  0.81 (6 H, t, *J* 6.5 Hz, CH<sub>2</sub>CH<sub>2</sub>CH<sub>3</sub>), 1.23 (18 H, m, alkyl), 1.50–1.60 (4 H, m,  $\beta$ -CH<sub>2</sub>), 2.27 (3 H, t, *J* 7.6 Hz, CO<sub>2</sub>CH<sub>2</sub>), 3.19–3.32 (2 H, m, H<sub>2,4</sub>), 3.35–3.42 (2 H, m, H<sub>3,5</sub>), 3.43–3.51 (1 H, m, OCH<sub>2</sub>CH<sub>2</sub>), 3.73–3.84 (1 H, m, OCH<sub>2</sub>CH<sub>2</sub>), 4.20 (2 H, m, H<sub>1,6</sub>), 4.27 (0.2 H, s, OH), 4.32 (1 H, m, H<sub>6</sub>), 4.65 (0.2 H, s, OH), 4.87 (0.2 H, s, OH); <sup>13</sup>C NMR (100 MHz, CDCl<sub>3</sub>:CD<sub>3</sub>OD 95:5)  $\delta$  14.0, 14.0, 22.6, 22.6, 24.9, 25.9, 28.9, 29.1, 29.3, 29.4, 29.6, 31.7, 31.8, 34.2 (alkyl), 63.6 (C<sub>6</sub>), 70.2 (C<sub>4</sub>), 70.3 (OCH<sub>2</sub>CH<sub>2</sub>), 73.4 (C<sub>2</sub>), 73.8 (C<sub>3</sub>), 76.3 (C<sub>5</sub>), 102.7 (C<sub>1</sub>), 174.4 (CO<sub>2</sub>); HRMS (ESI<sup>+</sup>) calcd for C<sub>22</sub>H<sub>42</sub>O<sub>7</sub> [M + H]<sup>+</sup> 419.3003. Found 419.3005.

### Octyl 6-*O*-palmitoyl- $\beta$ -D-glucoside (4)

Octyl  $\beta$ -D-glucoside (50 mg, 0.171 mmol) and palmitic acid (53 mg, 0.205 mol) according to the General procedure afforded **4** as a colourless glass (30 mg, 33%).  $[\alpha]_D^{25}$  -33.7 (c 1.5, CHCl<sub>3</sub>); <sup>1</sup>H NMR (400 MHz, CDCl<sub>3</sub>:CD<sub>3</sub>OD 95:5)  $\delta$  0.82 (6 H, t, *J* 6.7 Hz, CH<sub>2</sub>CH<sub>2</sub>CH<sub>3</sub>), 1.15–1.32 (34 H, m, alkyl), 1.51–1.62 (4 H, m,  $\beta$ -CH<sub>2</sub>), 2.28 (2 H, t, *J* 7.6 Hz, CO<sub>2</sub>CH<sub>2</sub>), 3.20–3.31 (2 H, m, H<sub>2,4</sub>), 3.36–3.43 (2 H, m, H<sub>3,5</sub>), 3.46 (1 H, dt, *J* 9.5, 7.0 Hz, OCH<sub>2</sub>CH<sub>2</sub>), 3.80 (1 H, dt, *J* 9.5, 7.0 Hz, OCH<sub>2</sub>CH<sub>2</sub>), 4.19 (1 H, d, *J* 7.8 Hz, H<sub>1</sub>), 4.22 (1 H, dd, *J* 12.1, 6.1 Hz, H<sub>6</sub>), 4.32 (1 H, dd, *J* 12.1, 2.1 Hz, H<sub>6</sub>); <sup>13</sup>C NMR (100 MHz, CDCl<sub>3</sub>:CD<sub>3</sub>OD 95:5)  $\delta$  14.07, 14.09, 22.67, 22.70, 24.96, 25.93, 29.18, 29.27, 29.33, 29.38, 29.43, 29.52, 29.64, 29.68, 29.69, 29.72, 31.8, 31.9, 34.2 (alkyl), 63.6 (C<sub>6</sub>), 70.2 (C<sub>4</sub>), 70.4 (OCH<sub>2</sub>CH<sub>2</sub>), 73.5 (C<sub>2</sub>), 73.9 (C<sub>3</sub>), 76.3 (C<sub>5</sub>), 102.8 (C<sub>1</sub>), 174.5 (CO<sub>2</sub>); HRMS (ESI<sup>+</sup>) calcd for C<sub>30</sub>H<sub>58</sub>O<sub>7</sub> [M + H]<sup>+</sup> 531.4255. Found 531.4260.

### Octyl 6-*O*-behenoyl- $\beta$ -D-glucoside (5)

Octyl  $\beta$ -D-glucoside (50 mg, 0.171 mmol) and behenic acid (70 mg, 0.205 mmol) according to the General procedure afforded **5** as a colourless glass (49 mg, 47%).  $[\alpha]_D^{25}$  -29.3 (c 1.6, CHCl<sub>3</sub>); <sup>1</sup>H NMR (400 MHz, CDCl<sub>3</sub>:CD<sub>3</sub>OD 95:5)  $\delta$  0.82 (6 H, t, *J* 6.7 Hz, CH<sub>2</sub>CH<sub>2</sub>CH<sub>3</sub>), 1.00–1.32 (46 H, m, alkyl), 1.51–1.61 (4 H, m,  $\beta$ -CH<sub>2</sub>), 2.28 (2 H, t, *J* 7.6 Hz, CO<sub>2</sub>CH<sub>2</sub>), 3.20–3.32 (2 H, m, H<sub>2,4</sub>), 3.36–3.43 (2 H, m, H<sub>3,5</sub>), 3.47 (1 H, dt, *J* 7.0, 9.4 Hz, OCH<sub>2</sub>CH<sub>2</sub>), 3.80 (1 H, dt, *J* 7.0, 9.4 Hz, OCH<sub>2</sub>CH<sub>2</sub>), 4.19 (1 H, d, *J* 8.0 Hz, H<sub>1</sub>), 4.17–4.26 (1 H, m, H<sub>6</sub>), 4.32 (1 H, dd, *J* 2.1, 11.9 Hz, H<sub>6</sub>); <sup>13</sup>C NMR (100 MHz, CDCl<sub>3</sub>:CD<sub>3</sub>OD 95:5)  $\delta$  14.07, 14.10, 22.67, 22.71, 25.0, 25.9, 29.2, 29.27, 29.34, 29.38, 29.43, 29.5, 29.6, 29.68, 29.71, 29.73, 31.8, 31.9, 34.2 (alkyl), 63.6 (C<sub>6</sub>), 70.2 (C<sub>4</sub>), 70.4 (OCH<sub>2</sub>CH<sub>2</sub>),

73.5 (C2), 73.9 (C3), 76.3 (C5), 102.8 (C1), 174.5 (CO<sub>2</sub>); HRMS (ESI<sup>+</sup>) calcd for C<sub>36</sub>H<sub>70</sub>O<sub>7</sub> [M + H]<sup>+</sup> 615.9154. Found 615.9156.

#### **Octyl 6-*O*-cholesteryloxyacetyl-β-D-glucoside (14)**

Octyl β-D-glucoside (25 mg, 0.086 mmol) and **13** (46 mg, 0.103 mmol) according to the General procedure afforded **14** as a colourless glass (29 mg, 47%). <sup>1</sup>H NMR (400 MHz, CDCl<sub>3</sub>:CD<sub>3</sub>OD 95:5) δ 0.62 (3 H, s), 0.74–1.66 (48 H, m, alkyl, cholesterol), 1.71–2.00 (5 H, m), 2.20 (1 H, m, H4'), 2.33 (1 H, m, H4'), 3.16–3.49 (6 H, m, OCH<sub>2</sub>CH<sub>2</sub>, H<sub>2,3,4,5,3'</sub>), 3.79 (1 H, dt, *J* 6.9, 9.5 Hz, OCH<sub>2</sub>CH<sub>2</sub>), 4.11 (2 H, s, O=CCH<sub>2</sub>O), 4.20 (1 H, d, *J* 7.7 Hz, H1), 4.30 (1 H, dd, *J* 5.5, 11.9 Hz, H6), 4.39 (1 H, dd, *J* 2.2, 11.9 Hz, H6), 5.28–5.32 (1 H, m, HC=H); <sup>13</sup>C NMR (100 MHz, CDCl<sub>3</sub>:CD<sub>3</sub>OD 95:5) δ 11.8, 14.0, 18.6, 19.2, 21.0, 22.4, 22.6, 22.7, 23.7, 24.2, 25.8, 27.9, 28.0, 28.1, 29.2, 29.4, 29.5, 31.76, 31.79, 31.84, 35.7, 36.1, 36.7, 37.0, 38.5, 39.4, 39.7, 42.2, 50.1, 56.1, 56.7 (alkyl, cholesterol), 63.8 (C6), 65.3 (O=CCH<sub>2</sub>O), 69.9 (C4), 70.3 (OCH<sub>2</sub>CH<sub>2</sub>), 73.3 (C2), 73.6 (C3), 76.2 (C5), 80.1 (C3'), 102.7 (C1), 122.0 (HC=C), 140.2 (C=CH), 171.2 (CO<sub>2</sub>); HRMS (ESI<sup>+</sup>) calcd for C<sub>43</sub>H<sub>74</sub>O<sub>8</sub> [M + H]<sup>+</sup> 719.5457. Found 719.5456.

#### **Octyl 6-*O*-(2-hexadecyloctadecanoyl)-β-D-glucoside (9)**

Octyl β-D-glucoside (25 mg, 0.086 mmol) and 2-hexadecyloctadecanoic acid (52 mg, 0.103 mmol) according to the General procedure afforded **9** as a colourless glass (11 mg, 15%). <sup>1</sup>H NMR (400 MHz, CDCl<sub>3</sub>:CD<sub>3</sub>OD 95:5) δ 0.82 (9 H, t, *J* 6.8 Hz, CH<sub>2</sub>CH<sub>2</sub>CH<sub>3</sub>), 1.14–1.33 (66 H, m, acyl), 1.33–1.45 (2 H, m, β-CH<sub>2</sub>), 1.55 (4 H, m, β-CH<sub>2</sub>), 2.31 (1 H, tt, *J* 5.4, 8.6 Hz, CO<sub>2</sub>CH), 3.19–3.30 (2 H, m, H<sub>2,4</sub>), 3.35–3.50 (3 H, m, OCH<sub>2</sub>CH<sub>2</sub>, H<sub>3,5</sub>), 3.81 (1 H, dt, *J* 6.9, 9.6 Hz, OCH<sub>2</sub>CH<sub>2</sub>), 4.17 (1 H, dd, *J* 6.6, 11.8 Hz, H6), 4.20 (1 H, d, *J* 7.8 Hz, H1), 4.39 (1 H, dd, *J* 2.0, 11.9 Hz, H6); <sup>13</sup>C NMR (100 MHz, CDCl<sub>3</sub>:CD<sub>3</sub>OD 95:5) δ 13.97, 13.99, 22.57, 22.60, 25.9, 27.3, 29.2, 29.3, 29.36, 29.43, 29.5, 29.56, 29.58, 29.60, 29.63, 31.75, 31.84, 32.26, 32.28 (alkyl), 45.7 (α-acyl), 63.5 (C6), 70.1 (C4), 70.3 (OCH<sub>2</sub>CH<sub>2</sub>), 73.4 (C2), 73.9 (C3), 76.2 (C5), 102.6 (C1), 177.1 (CO<sub>2</sub>); HRMS (ESI<sup>+</sup>) calcd for C<sub>48</sub>H<sub>94</sub>O<sub>7</sub> [M + H]<sup>+</sup> 783.7072. Found 783.7073.

#### **Lauryl 6-*O*-octanoyl-β-D-glucoside (6)**

Lauryl β-D-glucoside (50 mg, 0.143 mmol) and octanoic acid (27 μL, 0.172 mmol) according to the General procedure afforded **6** as a colourless glass (38 mg, 56%). [α]<sub>D</sub><sup>25</sup> -24.9 (c 1.3, CHCl<sub>3</sub>); <sup>1</sup>H NMR (400 MHz, CDCl<sub>3</sub>:CD<sub>3</sub>OD 95:5) δ 0.82 (6 H, t, *J* 6.6 Hz, CH<sub>2</sub>CH<sub>2</sub>CH<sub>3</sub>), 1.16–1.30 (26 H, m, alkyl), 1.51–1.61 (4 H, m, β-CH<sub>2</sub>), 2.29 (2 H, t, *J* 7.6 Hz, CO<sub>2</sub>CH<sub>2</sub>), 3.21–3.31 (2 H, m, H<sub>2,4</sub>), 3.36–3.43 (2 H, m, H<sub>3,5</sub>), 3.47 (1 H, dt, *J* 7.0, 9.5 Hz, OCH<sub>2</sub>CH<sub>2</sub>), 3.80 (1 H, dt, *J* 7.0, 9.5 Hz, OCH<sub>2</sub>CH<sub>2</sub>), 4.20 (1 H, d, *J* 7.8 Hz, H1), 4.22 (1 H, dd, *J* 6.0, 12.1 Hz, H6), 4.32 (1 H, dd, *J* 2.1, 11.9 Hz, H6); <sup>13</sup>C

NMR (100 MHz, CDCl<sub>3</sub>:CD<sub>3</sub>OD 95:5)  $\delta$  14.0, 14.1, 22.6, 22.7, 24.9, 25.9, 29.0, 29.1, 29.4, 29.5, 29.63, 29.65, 29.66, 29.70, 31.7, 31.9, 34.2 (alkyl), 63.6 (C6), 70.2 (C4), 70.4 (OCH<sub>2</sub>CH<sub>2</sub>), 73.5 (C2), 73.9 (C3), 76.3 (C5), 102.8 (C1), 174.5 (CO<sub>2</sub>); HRMS (ESI<sup>+</sup>) calcd for C<sub>26</sub>H<sub>50</sub>O<sub>7</sub> [M + H]<sup>+</sup> 475.3629. Found 479.3630.

#### **Lauryl 6-*O*-palmitoyl- $\beta$ -D-glucoside (7)**

Lauryl  $\beta$ -D-glucoside (50 mg, 0.143 mmol) and palmitic acid (44 mg, 0.172 mmol) according to the General procedure afforded **7** as a colourless glass (39 mg, 46%). [ $\alpha$ ]<sub>D</sub><sup>25</sup> -26.6 (c 1.3, CHCl<sub>3</sub>); <sup>1</sup>H NMR (400 MHz, CDCl<sub>3</sub>:CD<sub>3</sub>OD 95:5)  $\delta$  0.82 (6 H, t, *J* 6.7 Hz, CH<sub>2</sub>CH<sub>2</sub>CH<sub>3</sub>), 1.13–1.31 (42 H, m, alkyl), 1.50–1.62 (4 H, m,  $\beta$ -CH<sub>2</sub>), 2.28 (2 H, t, *J* 7.6 Hz, CO<sub>2</sub>CH<sub>2</sub>), 3.21–3.31 (2 H, m, H<sub>2,4</sub>), 3.36–3.43 (2 H, m, H<sub>3,5</sub>), 3.47 (1 H, dt, *J* 7.1, 9.5 Hz, OCH<sub>2</sub>CH<sub>2</sub>), 3.80 (1 H, dt, *J* 7.0, 9.5 Hz, OCH<sub>2</sub>CH<sub>2</sub>), 4.20 (1 H, d, *J* 7.8 Hz, H<sub>1</sub>), 4.22 (1 H, dd, *J* 6.1, 12.1 Hz, H<sub>6</sub>), 4.32 (1 H, dd, *J* 2.1, 12.0 Hz, H<sub>6</sub>); <sup>13</sup>C NMR (100 MHz, CDCl<sub>3</sub>:CD<sub>3</sub>OD 95:5)  $\delta$  14.1, 22.7, 25.0, 25.9, 29.2, 29.3, 29.4, 29.50, 29.52, 29.64, 29.65, 29.67, 29.70, 29.71, 29.71, 29.73, 31.9, 34.2 (alkyl), 63.6 (C6), 70.2 (C4), 70.4 (OCH<sub>2</sub>CH<sub>2</sub>), 73.5 (C2), 73.9 (C3), 76.3 (C5), 102.8 (C1), 174.5 (CO<sub>2</sub>); HRMS (ESI<sup>+</sup>) calcd for C<sub>34</sub>H<sub>66</sub>O<sub>7</sub> [M + H]<sup>+</sup> 587.4881. Found 587.4880.

#### **Lauryl 6-*O*-behenoyl- $\beta$ -D-glucoside (8)**

Lauryl  $\beta$ -D-glucoside (50 mg, 0.143 mmol) and behenic acid (59 mg, 0.172 mmol) according to the General procedure afforded **8** as a colourless glass (45 mg, 47%). [ $\alpha$ ]<sub>D</sub><sup>25</sup> -24.4 (c 1.5, CHCl<sub>3</sub>); <sup>1</sup>H NMR (400 MHz, CDCl<sub>3</sub>:CD<sub>3</sub>OD 95:5)  $\delta$  0.82 (6 H, t, *J* 6.7 Hz, CH<sub>2</sub>CH<sub>2</sub>CH<sub>3</sub>), 1.14–1.31 (54 H, m, alkyl), 1.51–1.62 (4 H, m,  $\beta$ -CH<sub>2</sub>), 2.28 (2 H, t, *J* 7.6 Hz, CO<sub>2</sub>CH<sub>2</sub>), 3.21–3.31 (2 H, m, H<sub>2,4</sub>), 3.36–3.43 (2 H, m, H<sub>3,5</sub>), 3.47 (1 H, dt, *J* 7.0, 9.5 Hz, OCH<sub>2</sub>CH<sub>2</sub>), 3.80 (1 H, dt, *J* 7.0, 9.5 Hz, OCH<sub>2</sub>CH<sub>2</sub>), 4.20 (1 H, d, *J* 7.7 Hz, H<sub>1</sub>), 4.22 (1 H, dd, *J* 6.1, 12.1 Hz, H<sub>6</sub>), 4.32 (1 H, dd, *J* 2.2, 12.0 Hz, H<sub>6</sub>); <sup>13</sup>C NMR (100 MHz, CDCl<sub>3</sub>:CD<sub>3</sub>OD 95:5)  $\delta$  14.1, 22.7, 25.0, 25.9, 29.2, 29.3, 29.4, 29.50, 29.53, 29.64, 29.65, 29.67, 29.69, 29.71, 29.74, 32.0, 34.2 (alkyl), 63.6 (C6), 70.2 (C4), 70.4 (OCH<sub>2</sub>CH<sub>2</sub>), 73.5 (C2), 73.9 (C3), 76.3 (C5), 102.8 (C1), 174.5 (CO<sub>2</sub>); HRMS (ESI<sup>+</sup>) calcd for C<sub>40</sub>H<sub>78</sub>O<sub>7</sub> [M + H]<sup>+</sup> 671.5820. Found 671.5822.

#### **Lauryl 6-*O*-cholesteryloxyacetyl- $\beta$ -D-glucoside (15)**

Lauryl  $\beta$ -D-glucoside (25 mg, 0.072 mmol) and **13** (38 mg, 0.086 mmol) according to the General procedure afforded **15** as a colourless glass (25 mg, 45%). <sup>1</sup>H NMR (400 MHz, CDCl<sub>3</sub>:CD<sub>3</sub>OD 95:5)  $\delta$  0.63 (3 H, s), 0.76–1.61 (56 H, m, alkyl, cholesterol), 1.73–2.01 (5 H, m), 2.17–2.26 (1 H, m, H<sub>4'</sub>), 2.30–2.37 (1 H, m, H<sub>4'</sub>), 3.17–3.51 (6 H, m, OCH<sub>2</sub>CH<sub>2</sub>, H<sub>2,3,4,5,3'</sub>), 3.80 (1 H, dt, *J* 6.9, 9.5 Hz, OCH<sub>2</sub>CH<sub>2</sub>), 4.12 (2 H, O=CCH<sub>2</sub>O), 4.21 (1 H, d, *J* 7.7 Hz, H<sub>1</sub>), 4.32 (1 H, dd, *J* 5.7, 11.9 Hz, H<sub>6</sub>),

4.40 (1 H, dd,  $J$  2.3, 11.9 Hz, H6), 5.31 (1 H, m, HC=H);  $^{13}\text{C}$  NMR (100 MHz,  $\text{CDCl}_3:\text{CD}_3\text{OD}$  95:5)  $\delta$  11.8, 14.0, 18.6, 19.2, 21.0, 22.5, 22.6, 22.7, 23.8, 24.2, 25.9, 27.9, 28.0, 28.2, 29.3, 29.5, 29.57, 29.60, 29.64, 31.8, 31.85, 31.86, 35.7, 36.1, 36.7, 37.0, 38.5, 39.4, 39.7, 42.3, 50.1, 56.1, 56.7 (alkyl, cholesterol), 63.8 (C6), 65.4 (O=CCH<sub>2</sub>O), 69.9 (C4), 70.3 (OCH<sub>2</sub>CH<sub>2</sub>), 73.4 (C2), 73.6 (C3), 76.2 (C5), 80.1 (C3'), 102.7 (C1), 122.0 (HC=C), 140.2 (C=CH), 171.2 (CO<sub>2</sub>); HRMS (ESI<sup>+</sup>) calcd for C<sub>47</sub>H<sub>82</sub>O<sub>8</sub> [M + H]<sup>+</sup> 775.6083. Found 775.6080.

### Lauryl 6-*O*-(2-hexadecyloctadecanoyl)- $\beta$ -D-glucoside (10)

Lauryl  $\beta$ -D-glucoside (25 mg, 0.072 mmol) and 2-hexadecyloctadecanoic acid (44 mg, 0.086 mmol) according to the General procedure afforded **10** as a colourless glass (7 mg, 12%).  $^1\text{H}$  NMR (400 MHz,  $\text{CDCl}_3:\text{CD}_3\text{OD}$  95:5)  $\delta$  0.83 (9 H, t,  $J$  6.7 Hz), 1.10–1.33 (74 H, m, alkyl), 1.33–1.45 (2 H, m,  $\beta$ -CH<sub>2</sub>), 1.48–1.61 (4 H, m,  $\beta$ -CH<sub>2</sub>), 2.31 (1 H, tt,  $J$  5.5, 8.7 Hz, CO<sub>2</sub>CH), 3.21–3.29 (2 H, m, H2,4), 3.37–3.49 (3 H, m, OCH<sub>2</sub>CH<sub>2</sub>,H3,5), 3.80 (1 H, dt,  $J$  6.9, 9.5 Hz, OCH<sub>2</sub>CH<sub>2</sub>), 4.17 (1 H, dd,  $J$  6.7, 11.9 Hz, H6), 4.20 (1 H, d,  $J$  7.8 Hz, H1), 4.39 (1 H, dd,  $J$  2.1, 12.0 Hz, H6);  $^{13}\text{C}$  NMR (100 MHz,  $\text{CDCl}_3:\text{CD}_3\text{OD}$  95:5)  $\delta$  14.0, 22.6, 25.9, 27.3, 29.3, 29.4, 29.5, 29.58, 29.61, 29.63, 31.8, 32.3 (alkyl), 45.7 ( $\alpha$ -acyl), 63.5 (C6), 70.1 (C4), 70.3 (OCH<sub>2</sub>CH<sub>2</sub>), 73.4 (C2), 73.9 (C3), 76.2 (C5), 102.6 (C1), 177.1 (CO<sub>2</sub>); HRMS (ESI<sup>+</sup>) calcd for C<sub>52</sub>H<sub>102</sub>O<sub>7</sub> [M + H]<sup>+</sup> 839.7698. Found 839.7698.

### References

- 1 A. B. Pangborn, M. A. Giardello, R. H. Grubbs, R. K. Rosen and F. J. Timmers, *Organometallics*, 1996, **15**, 1518.
- 2 W. C. Still, M. Kahn and A. M. Mitra, *J. Org. Chem.*, 1978, **43**, 2923.

# NMR spectra

## Ethyl 2-(cholesteryloxy)-ethanoate (12)

### <sup>1</sup>H NMR

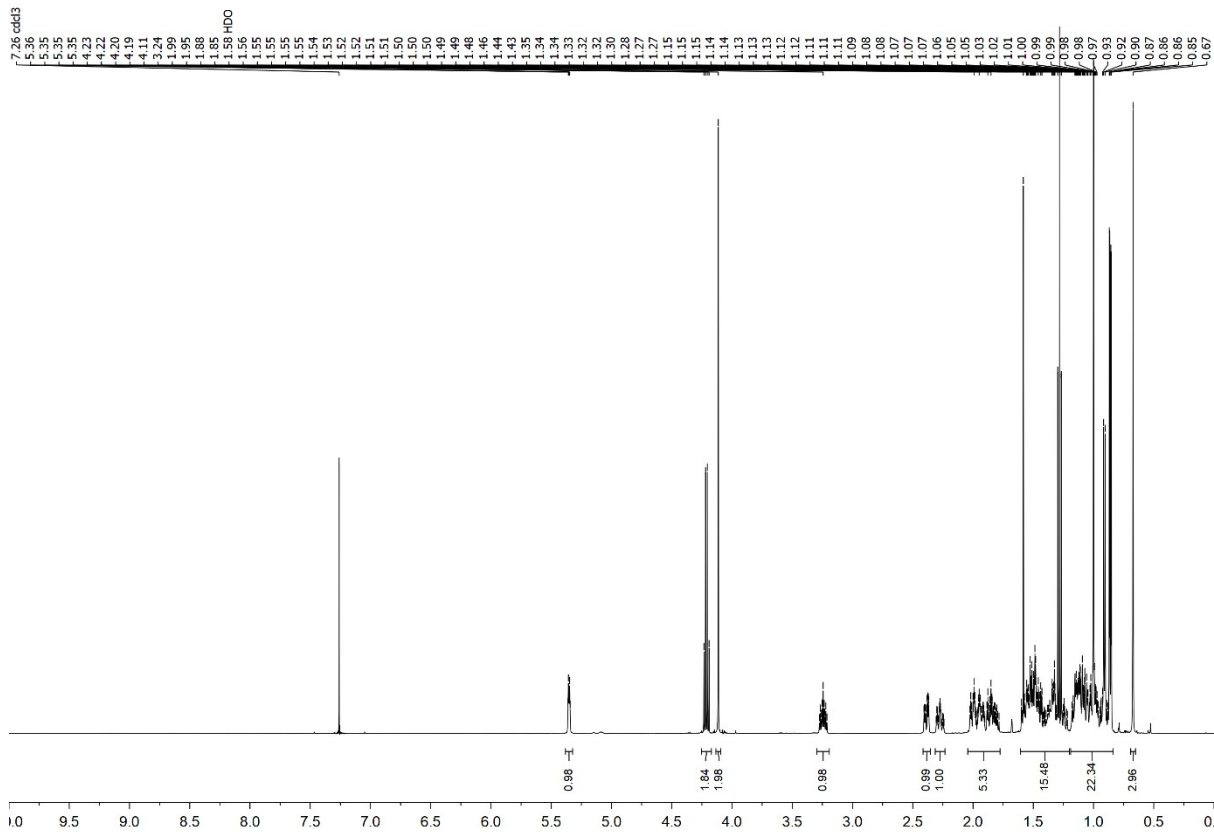

### <sup>13</sup>C NMR

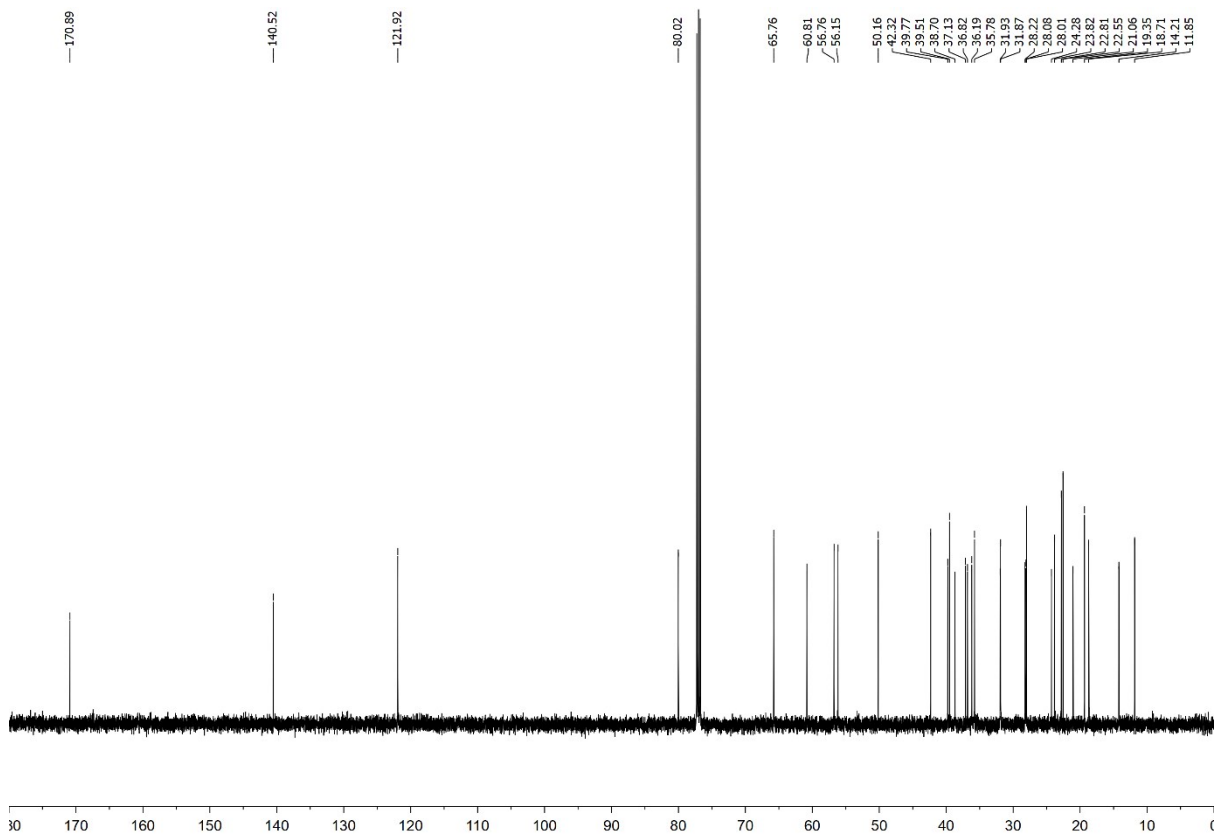



# 2-(Cholesteryloxy)-ethanoic acid (13)

## <sup>1</sup>H NMR

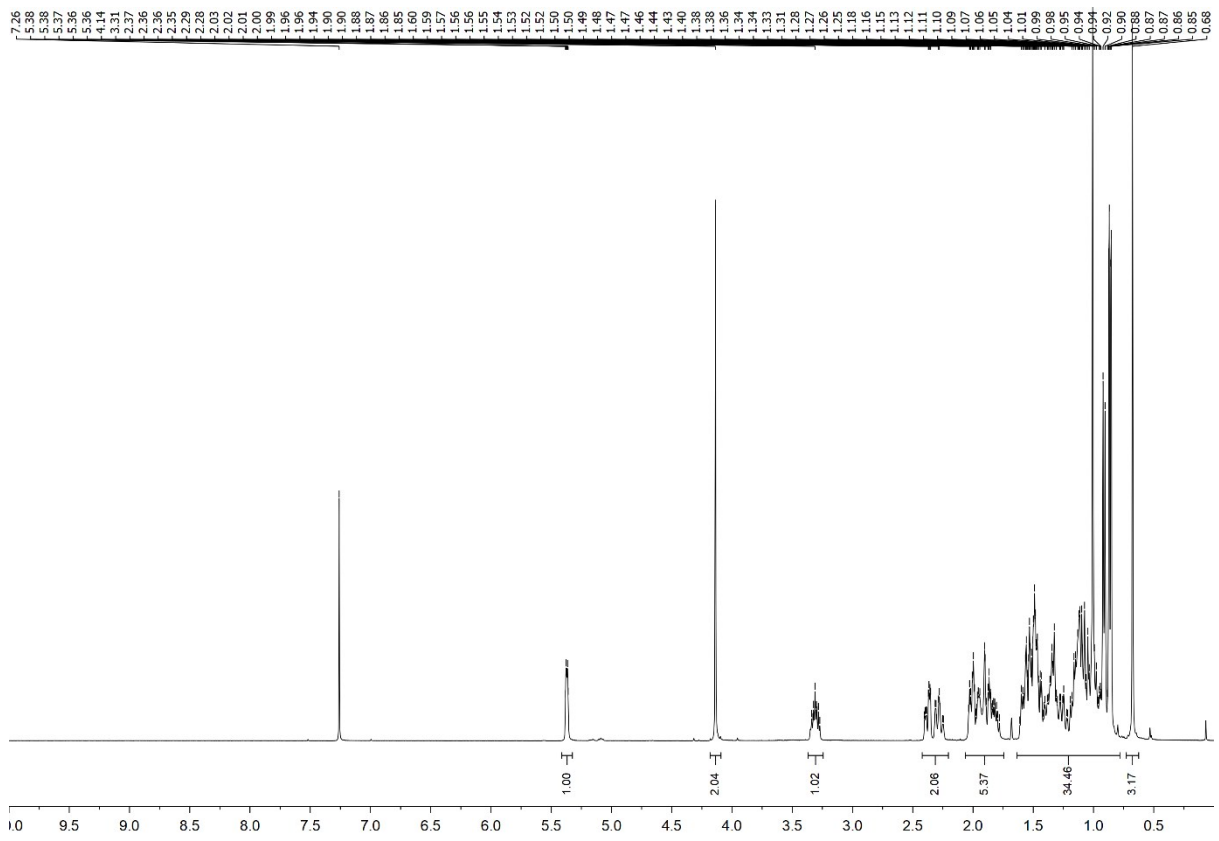

## <sup>13</sup>C NMR

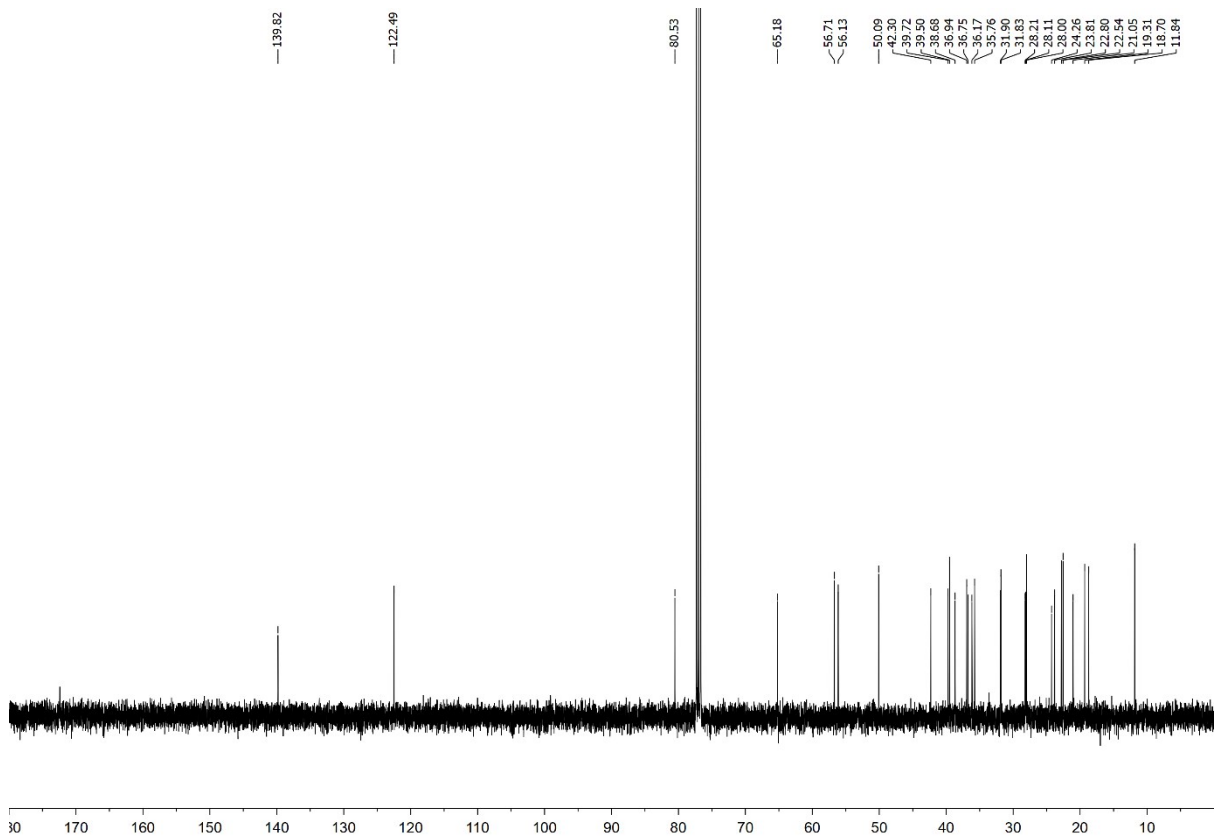

# Octyl 6-*O*-octanoyl- $\beta$ -D-glucoside (3)

$^1\text{H}$  NMR

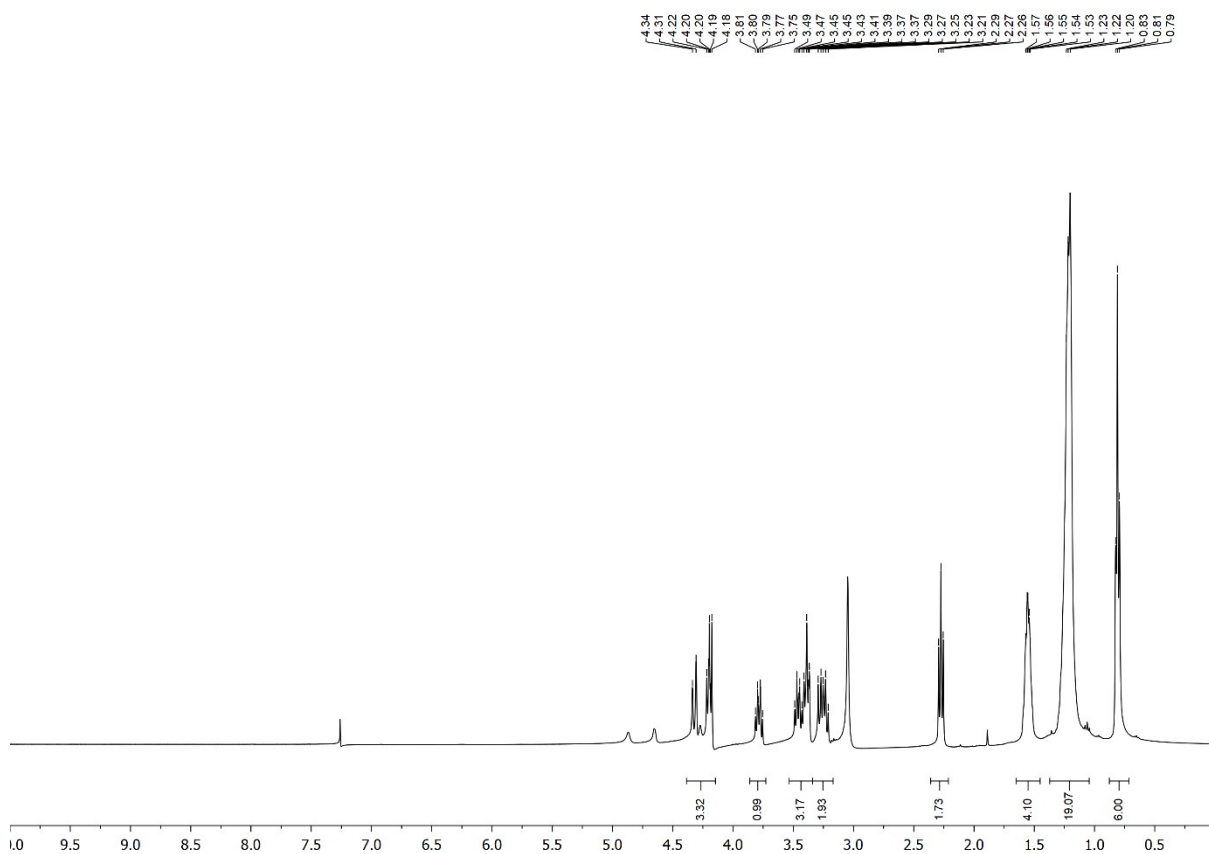

$^{13}\text{C}$  NMR

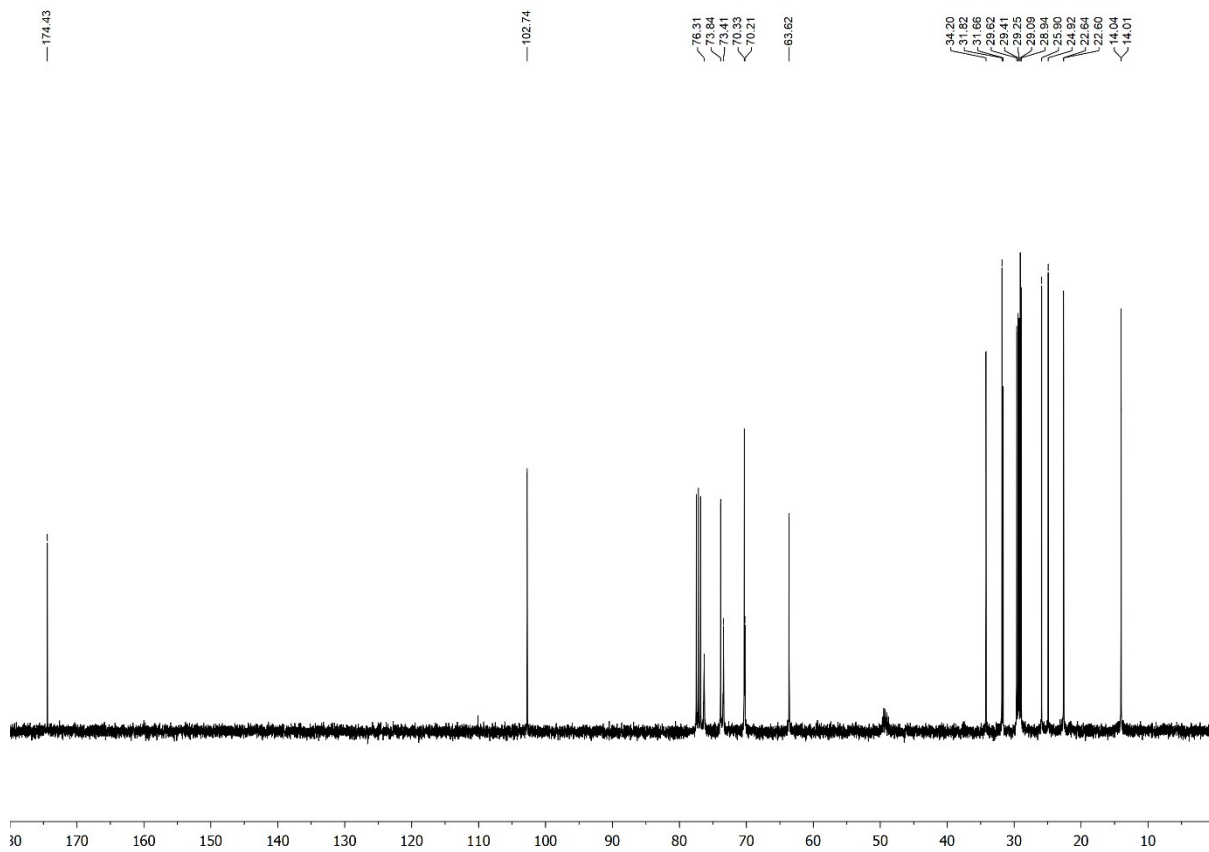

# Octyl 6-*O*-palmitoyl- $\beta$ -D-glucoside (4)

$^1\text{H}$  NMR

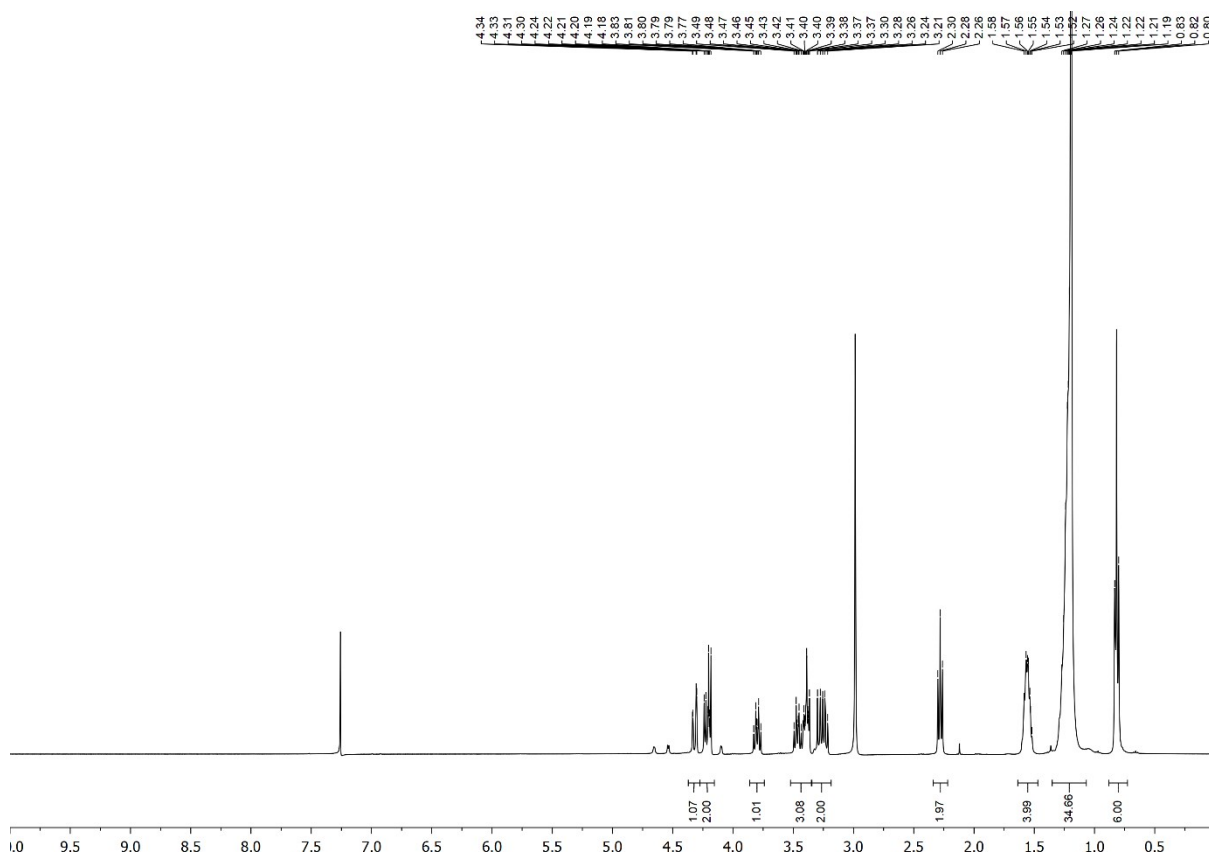

$^{13}\text{C}$  NMR

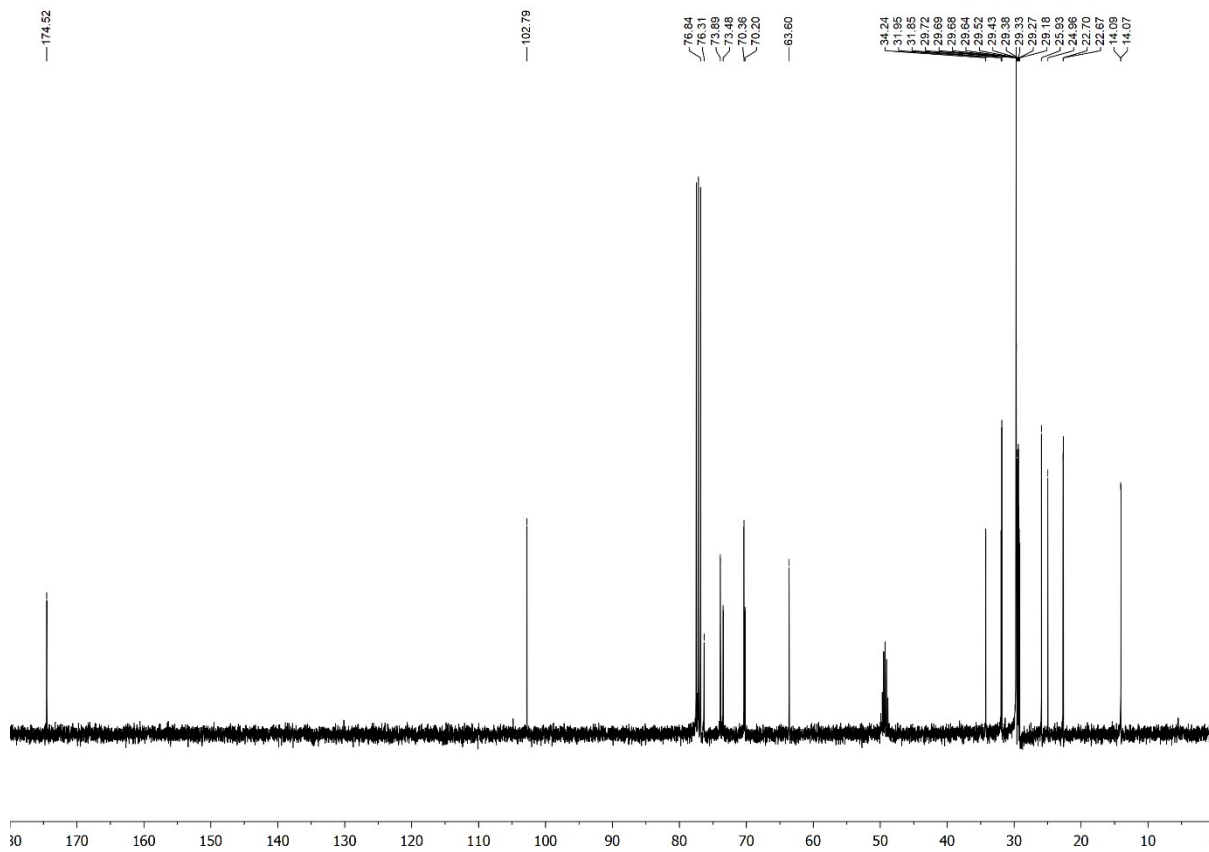

# Octyl 6-*O*-behenoyl- $\beta$ -D-glucoside (5)

$^1\text{H}$  NMR

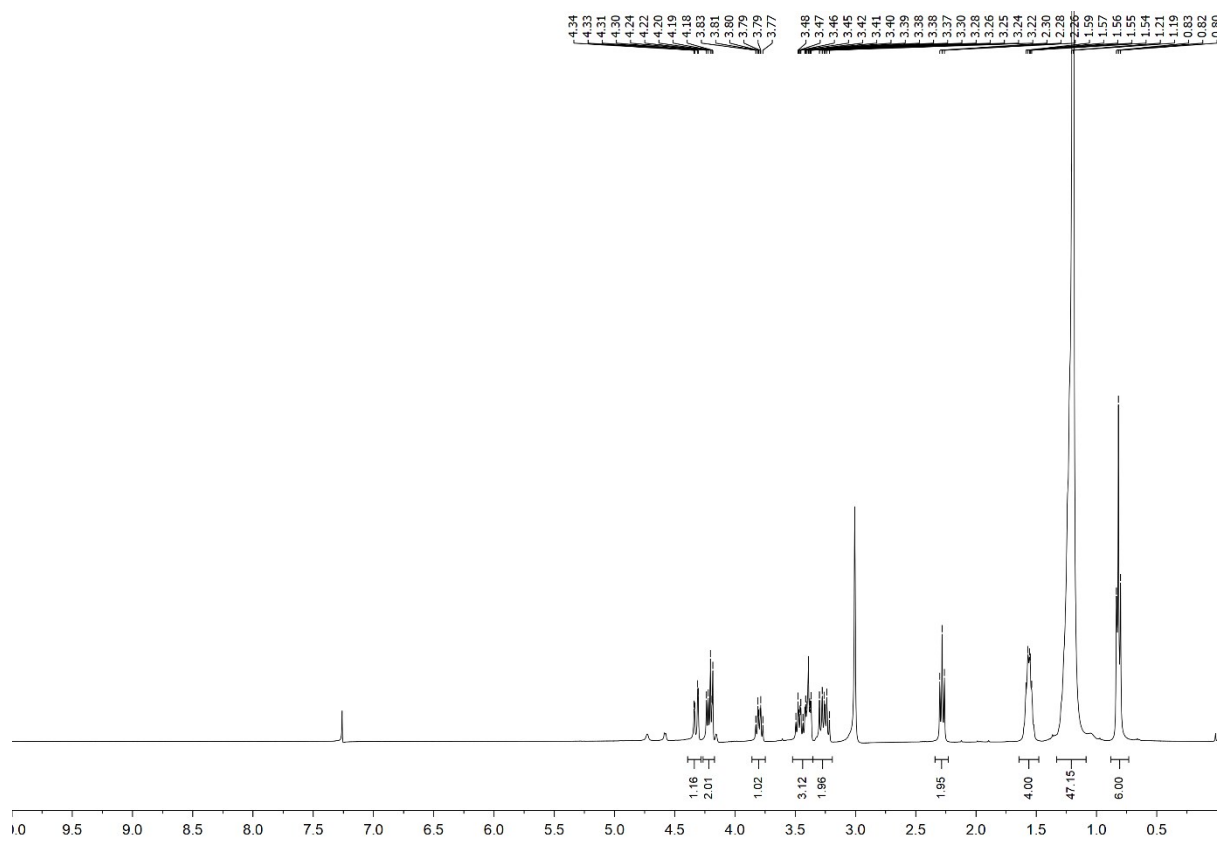

$^{13}\text{C}$  NMR

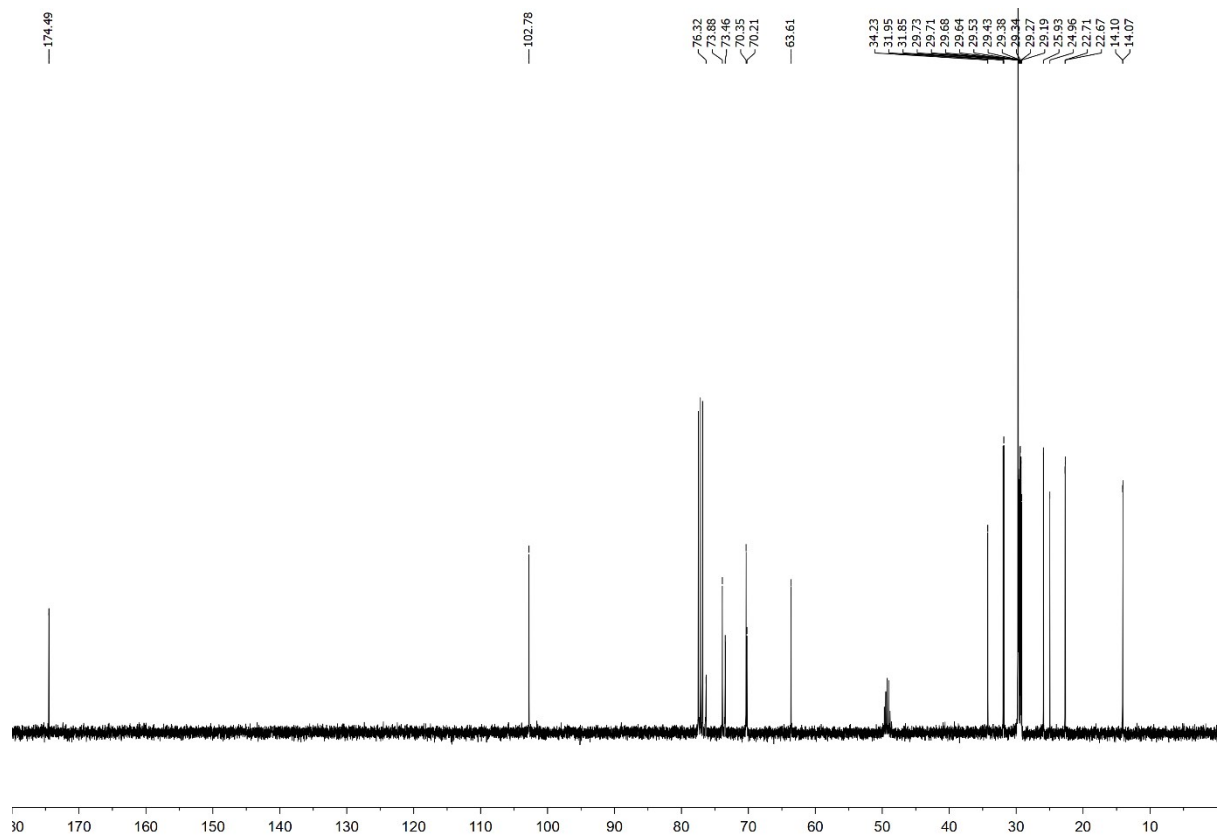

# Octyl 6-*O*-cholesteryloxyacetyl- $\beta$ -D-glucoside (14)

## $^1\text{H}$ NMR

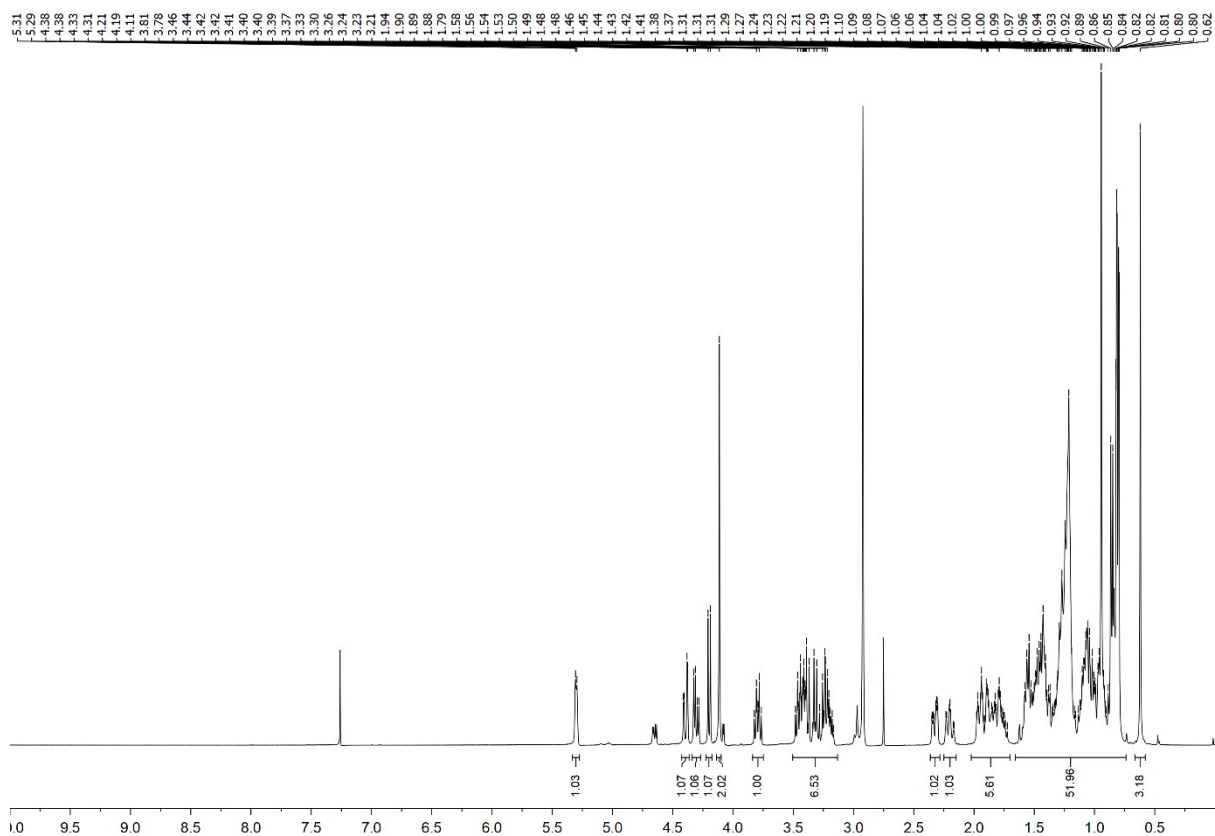

## $^{13}\text{C}$ NMR

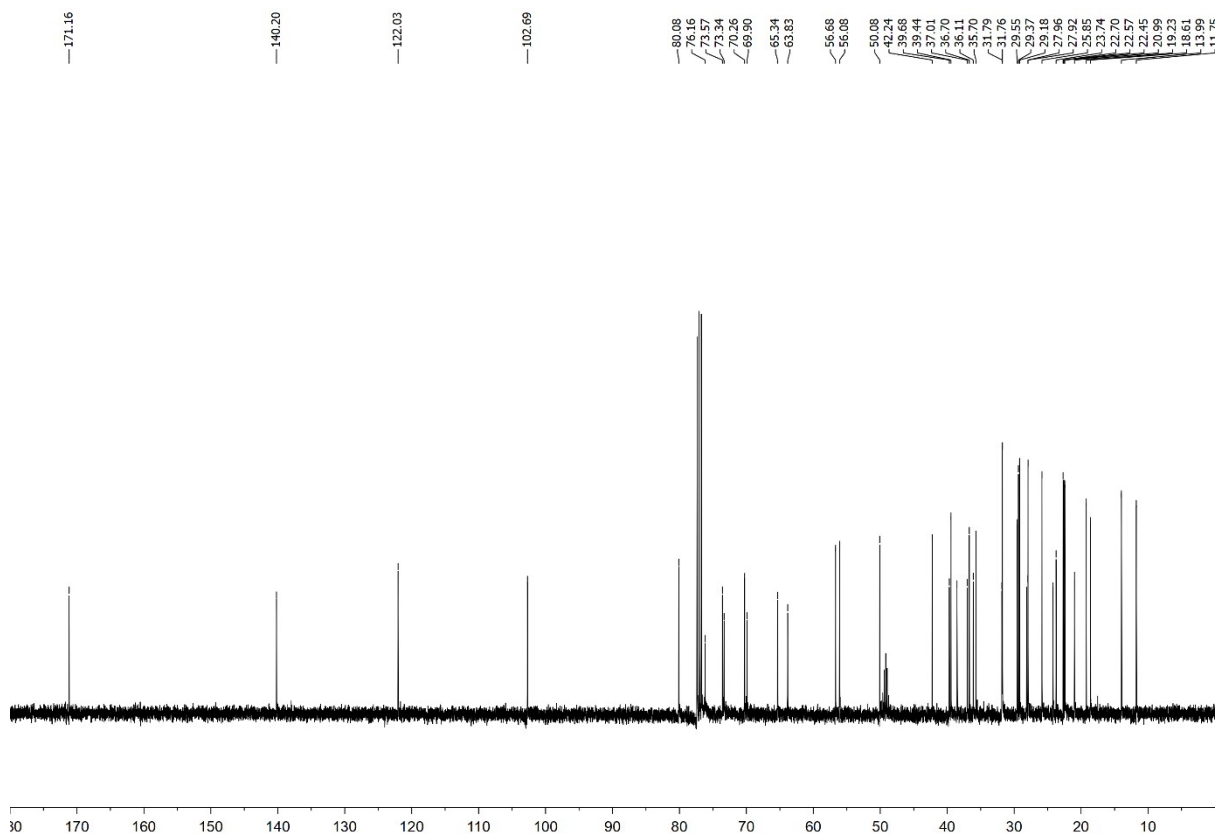

# Octyl 6-*O*-(2-hexadecyloctadecanoyl)- $\beta$ -D-glucoside (9)

$^1\text{H}$  NMR

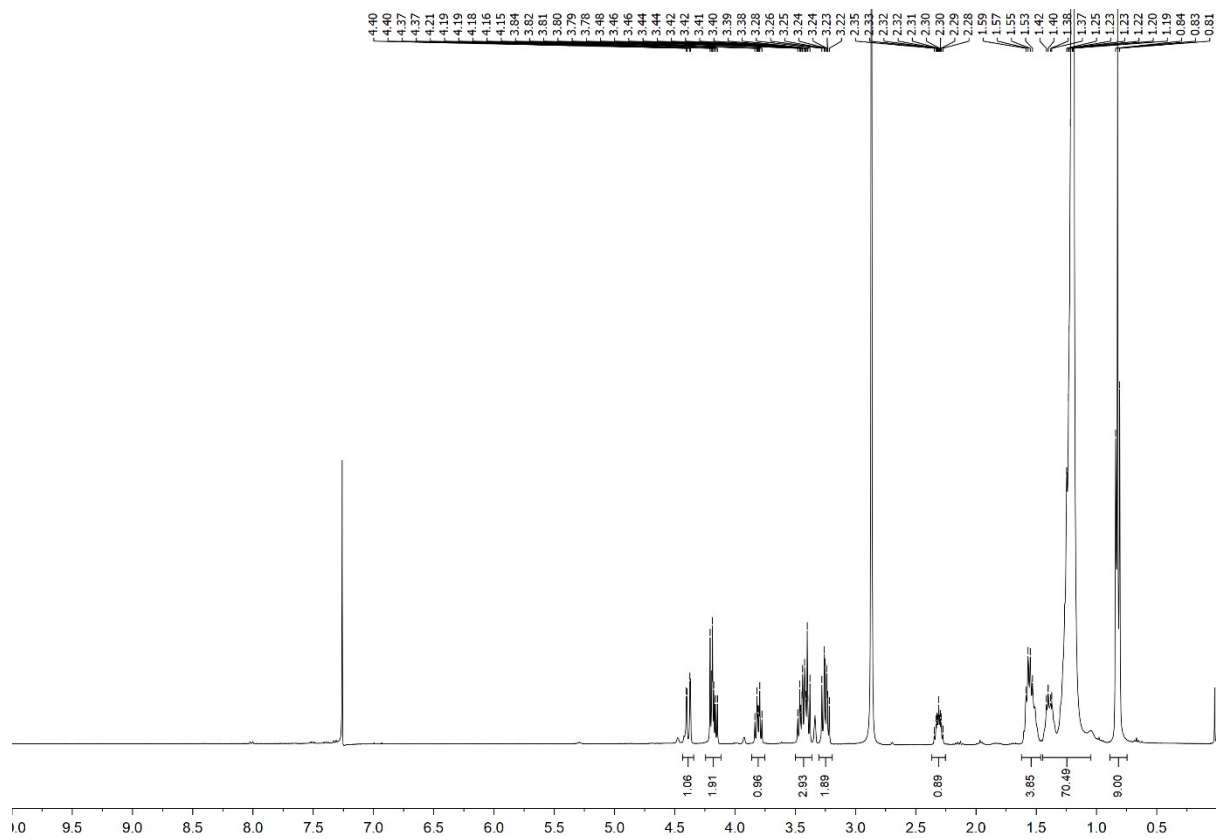

$^{13}\text{C}$  NMR

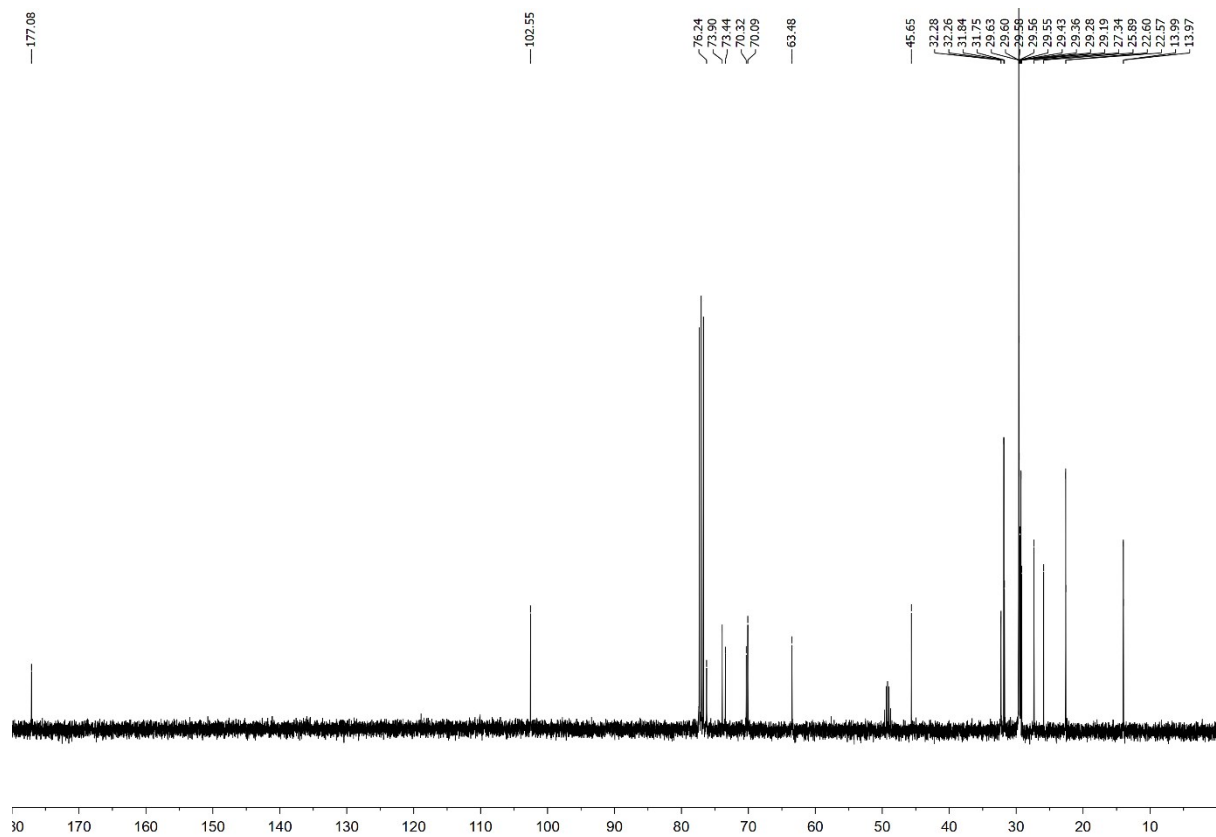

# Lauryl 6-O-octanoyl-β-D-glucoside (6)

<sup>1</sup>H NMR

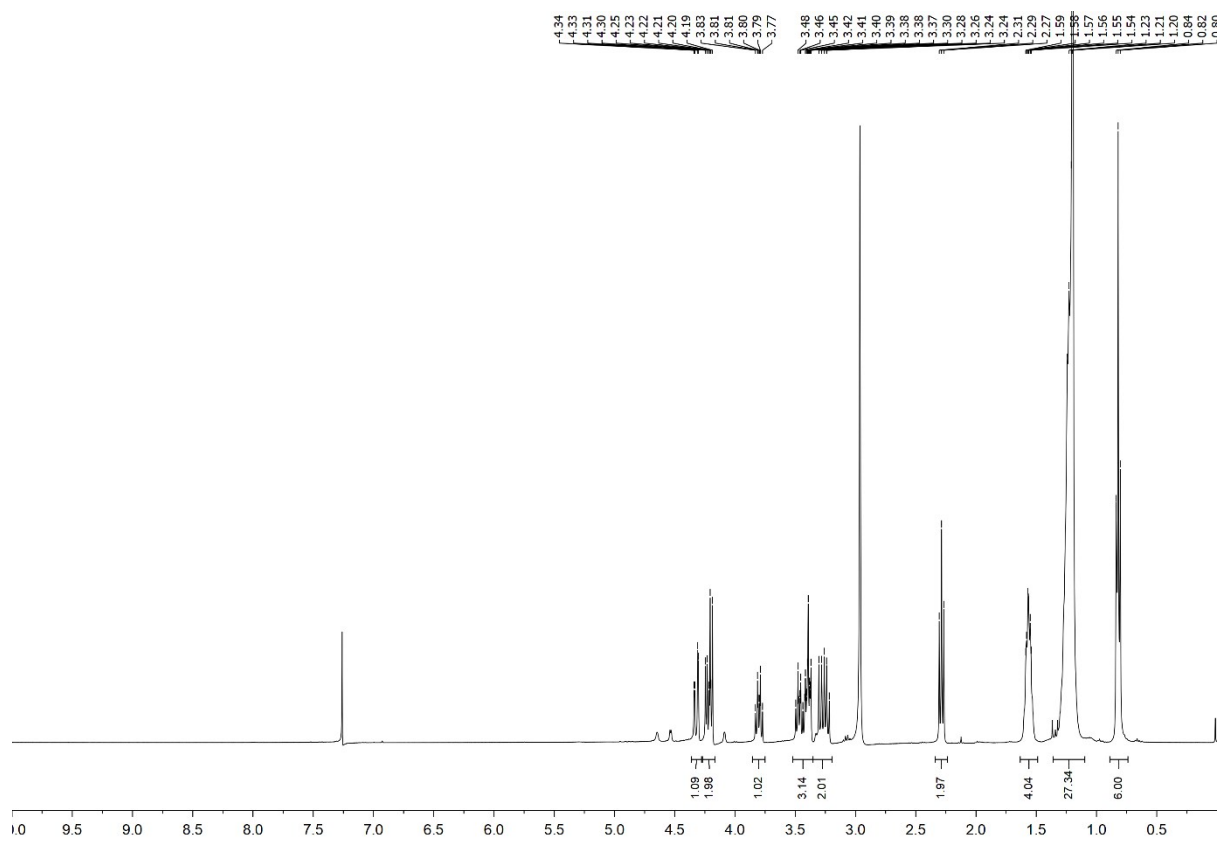

<sup>13</sup>C NMR

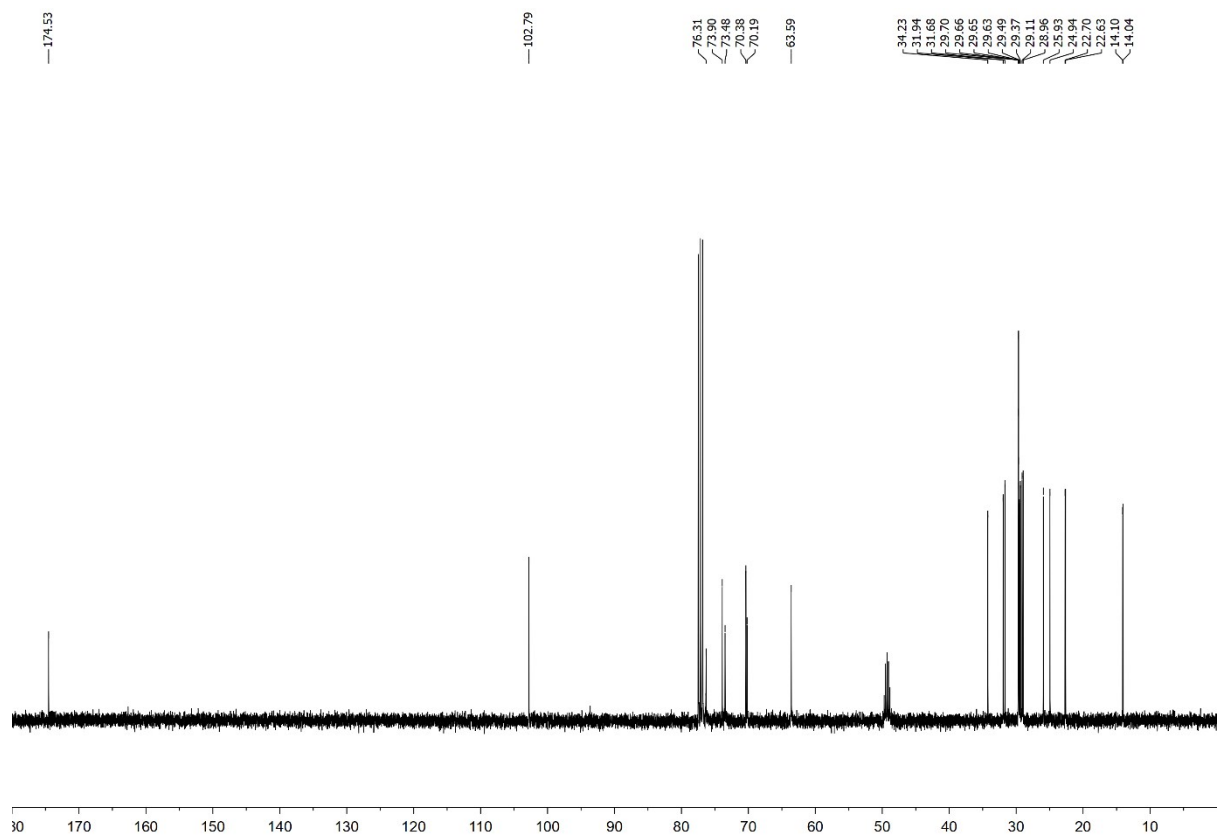

# Lauryl 6-O-palmitoyl-β-D-glucoside (7)

<sup>1</sup>H NMR

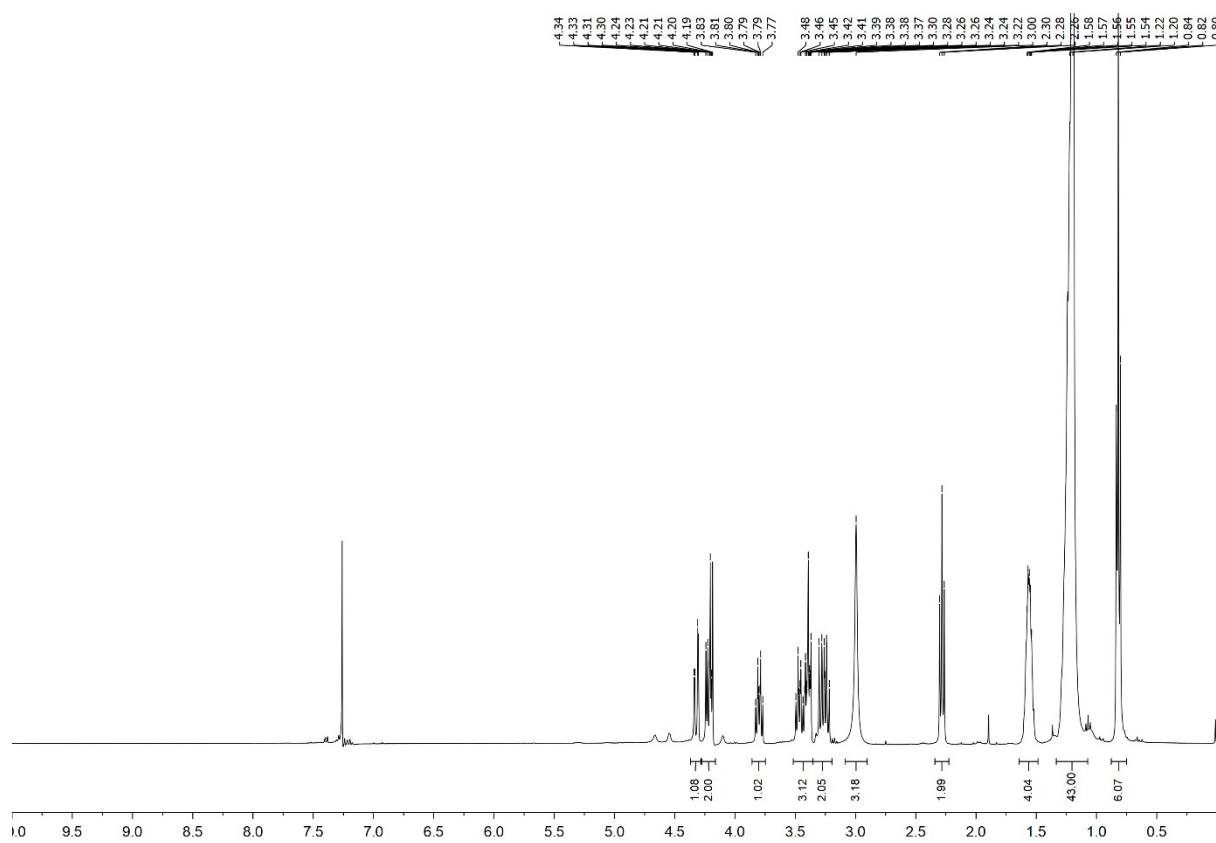

<sup>13</sup>C NMR

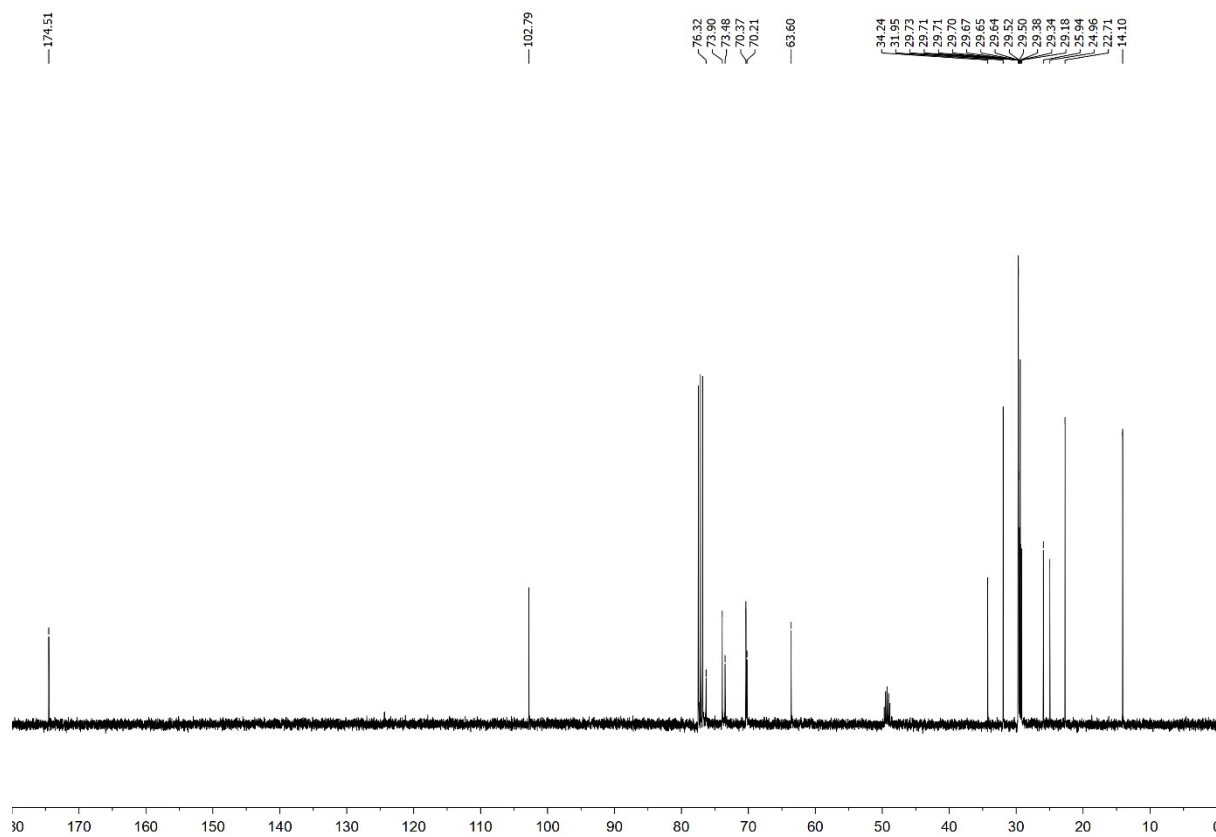



# Lauryl 6-O-behenoyl-β-D-glucoside (8)

<sup>1</sup>H NMR

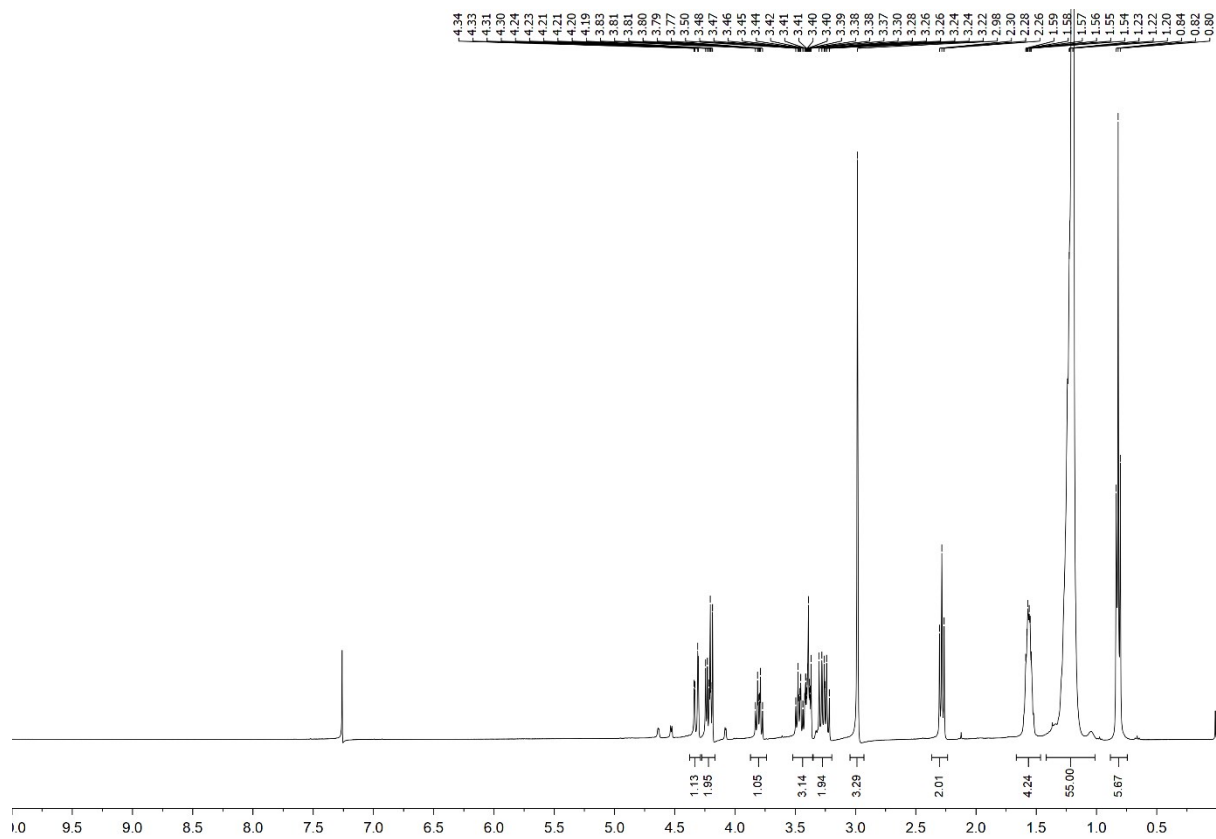

<sup>13</sup>C NMR

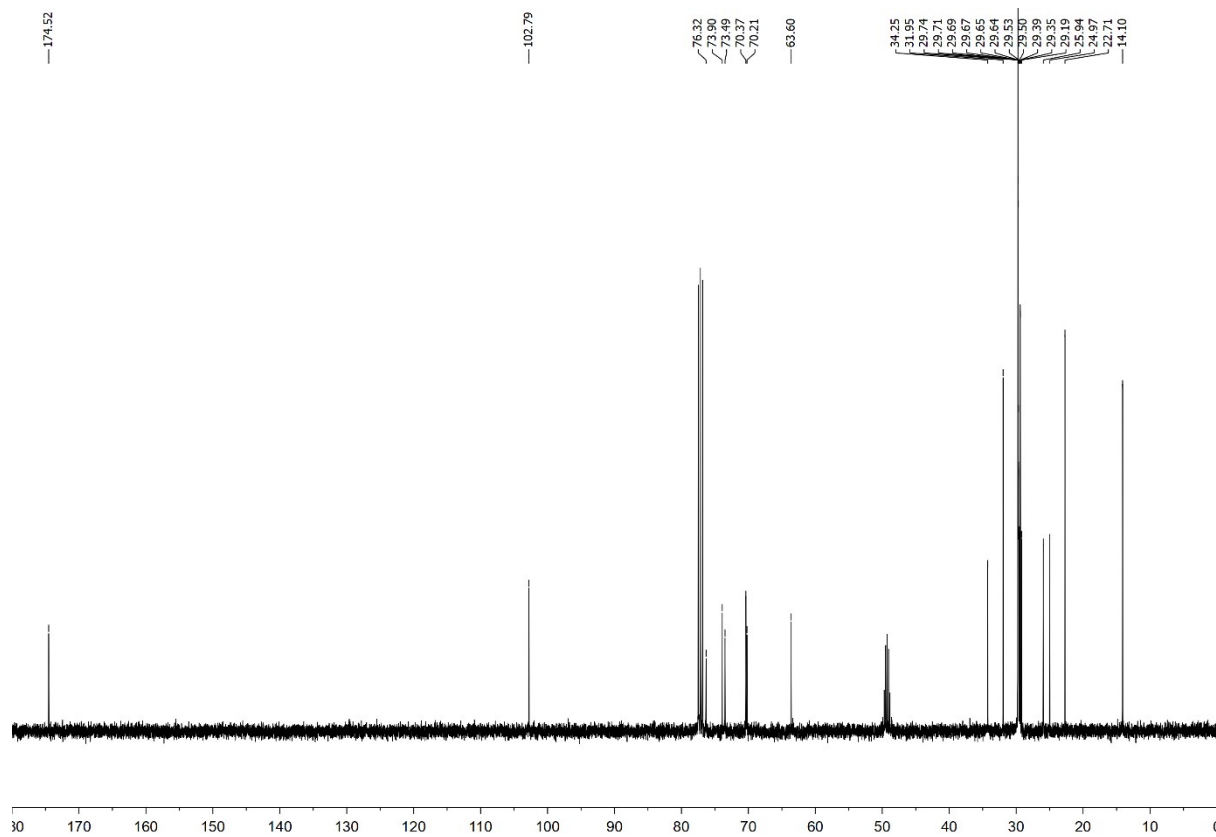

# Lauryl 6-*O*-cholesteryloxyacetyl- $\beta$ -D-glucoside (15)

## $^1\text{H}$ NMR

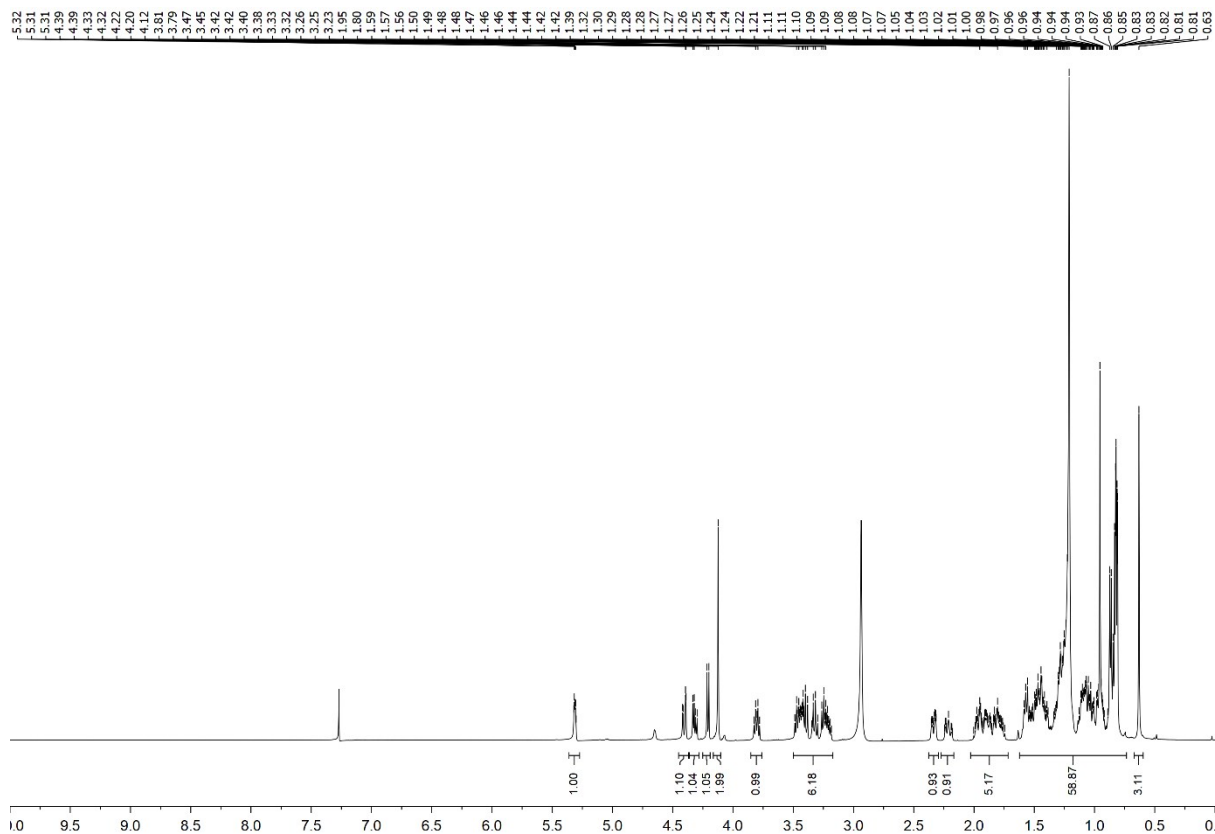

## $^{13}\text{C}$ NMR

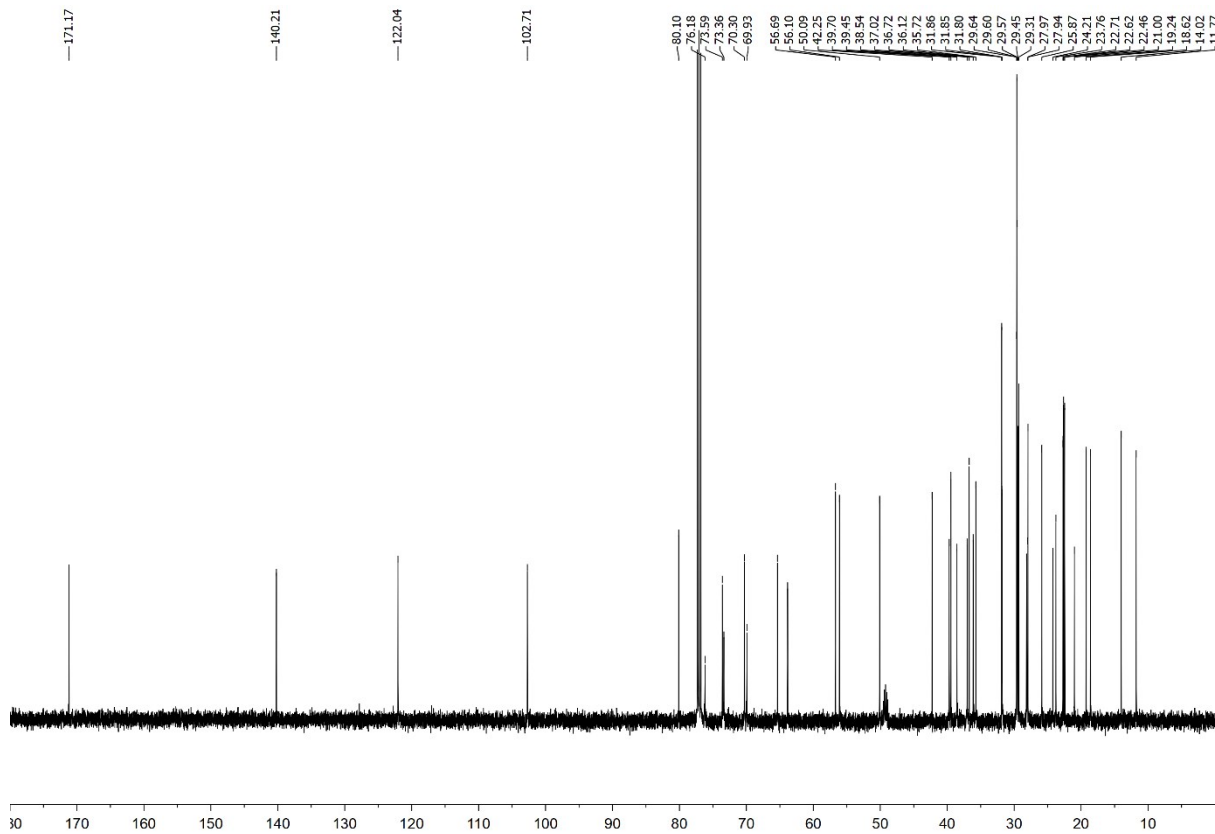

# Lauryl 6-*O*-(2-hexadecyloctadecanoyl)- $\beta$ -D-glucoside (10)

$^1\text{H}$  NMR

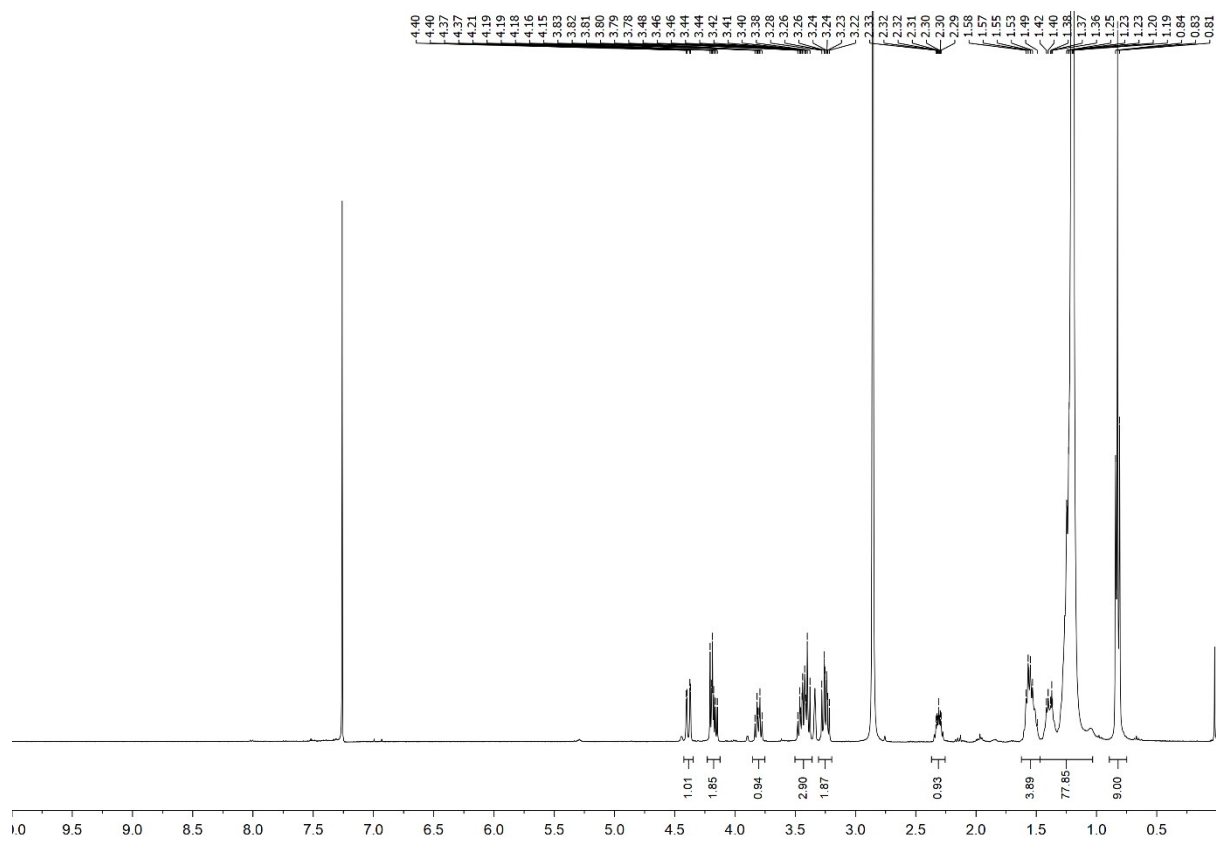

$^{13}\text{C}$  NMR

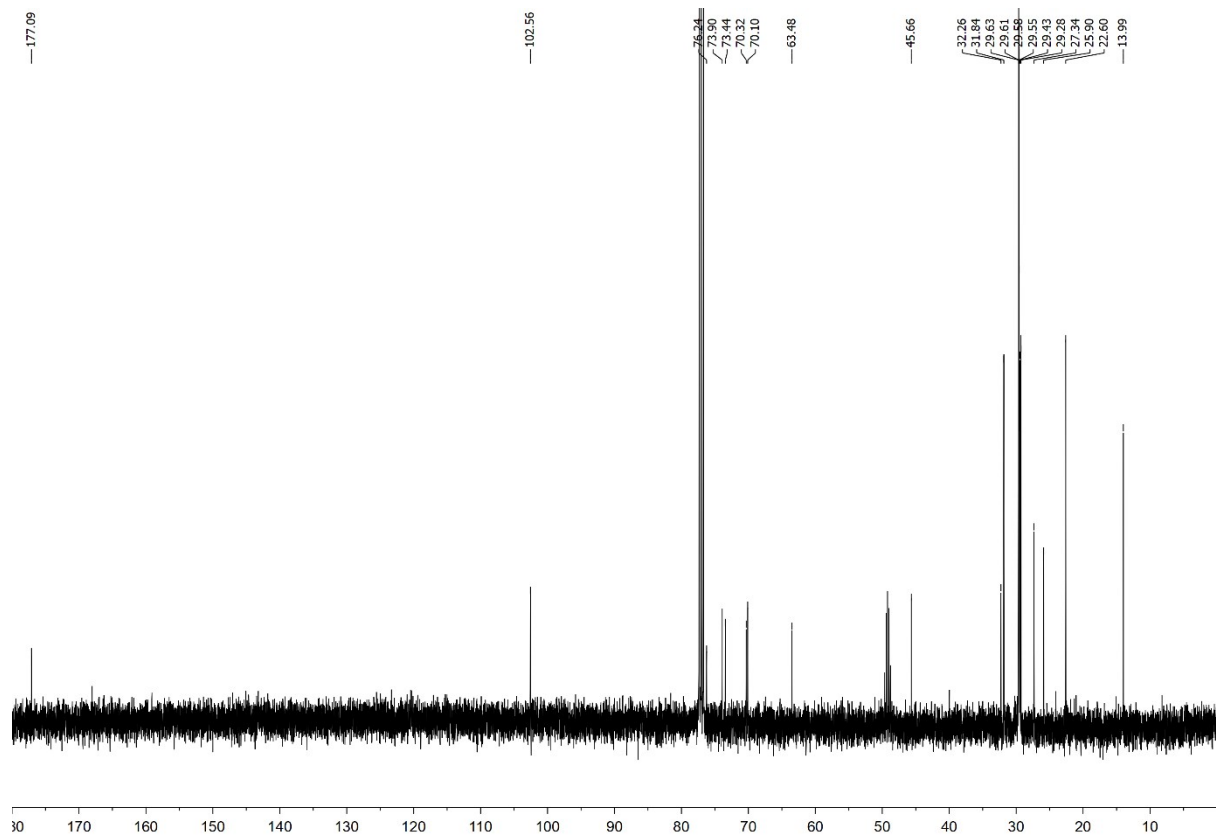

Supplement: d0cc00670j1.pdf [file d0cc00670j1.pdf]
